# Supplementary material for: Oral Anticoagulation Timing in Patients with Acute Ischemic Stroke and Atrial Fibrillation
Source: PubMed Central journal article supplement (PMC9251709; doi:10.1055/a-1669-4987), 2021-12-31
Supplement: 10-1055-a-1669-4987-s210330.pdf [file 10-1055-a-1669-4987-s210330.pdf]

**Supplementary Table S1** International Classification of Disease codes used in the study

| Outcomes                  | ICD9 and 10                                                                                                                                                                                                                                                                                                                                                                                                                                                                                                                                                                                                                                                                                                                                                                                                                                                                                                                                                                                       |
|---------------------------|---------------------------------------------------------------------------------------------------------------------------------------------------------------------------------------------------------------------------------------------------------------------------------------------------------------------------------------------------------------------------------------------------------------------------------------------------------------------------------------------------------------------------------------------------------------------------------------------------------------------------------------------------------------------------------------------------------------------------------------------------------------------------------------------------------------------------------------------------------------------------------------------------------------------------------------------------------------------------------------------------|
| Effectiveness             | 1. Ischemic stroke: 433.01, 433.11, 433.21, 433.31, 433.81, 433.91, 434.01, 434.11, 434.91, I63, I69.3<br>2. Cardiovascular death: I10–I15, I01–I02, I05–I09, I20–I25, I27, I30–I52, I60–I71<br>3. Myocardial infarction: 410–412, 429.7, I21–I24, I252<br>4. Systemic embolism: 444, I74<br>5. Venous thromboembolism: 453, 415, 451, 452, 437.6, I82, I26, I80, I81, I63.6, I67.6<br>6. Transient ischemic attack: 435, 437.7, 362.34, G45, H34.0                                                                                                                                                                                                                                                                                                                                                                                                                                                                                                                                               |
| Safety                    | 1. Hemorrhagic stroke: 430–432, 852–853, I60–I62, I69.0–I69.2, S064 × 0A–S066 × 9A, S06340A–S06369A<br>2. Hematuria: 599.7, R31<br>3. Gastrointestinal bleeding:<br><i>ICD9</i><br>456.0, 530.7, 531.0, 531.2, 531.4, 531.6, 532.0, 532.2, 532.4, 532.6, 533.0, 533.2, 533.4, 533.6, 534.0, 534.2, 534.4, 534.6, 569.3, 578.0, 578.1, 578.9, 531.1, 531.5, 532.1, 532.5, 533.1, 533.5, 534.1, 534.5, 456.20, 530.82, 535.01, 535.11, 535.21, 535.31, 535.41, 535.51, 535.61, 535.71, 537.83, 537.84, 562.02, 562.03, 562.12, 562.13, 569.85, 530.21, 569.86<br><i>ICD10</i><br>K22.6, K25.0–K25.2, K25.4–K25.6, K26.0–K26.2, K26.4–K26.6, K27.0–K27.2, K27.4–K27.6, K28.0–K28.2, K28.4–K28.6, K62.5, K92.0–K92.2, I85.01, I85.11, K31.82, K29.01, K29.31, K29.41, K29.51, K29.61, K29.21, K29.31, K29.61, K29.71, K29.91, K29.81, K31.82, K57.11, K57.51, K57.01, K57.13, K57.41, K57.53, K57.31, K57.51, K57.91, K57.21, K57.33, K57.41, K57.53, K57.81, K57.93, K55.21, K22.11, K63.81, K31.811 |
| Composite                 | Combination of effectiveness and safety outcomes                                                                                                                                                                                                                                                                                                                                                                                                                                                                                                                                                                                                                                                                                                                                                                                                                                                                                                                                                  |
| Drugs                     | ATC code                                                                                                                                                                                                                                                                                                                                                                                                                                                                                                                                                                                                                                                                                                                                                                                                                                                                                                                                                                                          |
| NOAC                      | Dabigatran (B01AE07), Rivaroxaban (B01AF01), Edoxaban (B01AF03), Apixaban (B01AF02)                                                                                                                                                                                                                                                                                                                                                                                                                                                                                                                                                                                                                                                                                                                                                                                                                                                                                                               |
| Warfarin                  | B01AA03                                                                                                                                                                                                                                                                                                                                                                                                                                                                                                                                                                                                                                                                                                                                                                                                                                                                                                                                                                                           |
| NSAID                     | M01AB16, M02AA25, A01AD05, B01AC06, N02BA01, M01BA03, N02BA51, B01AC56, N02BA71, C10BX08, C10BX12, C10BX06, C07FX04, N02AJ07, N02AJ02, C07FX03, N02AJ18, C10BX02, C10BX05, C10BX01, C10BX04, C07FX02, C08CA51, L01XX33, M01AH01, D11AX18, M01AB05, M02AA15, S01BC03, S01CC01, M01AB55, N02BA11, M01AB08, M01AH05, M01AE04, M01AG03, M01AE09, M02AA19, R02AX01, S01BC04, N02AJ08, M01AE14, C01EB16, G02CC01, M01AE01, M02AA13, R02AX02, M01AE51, N02AJ19, C01EB03, M01AB01, M02AA23, S01BC01, S01CC02, M01AB51, M01AE17, M02AA27, M01AE03, M02AA10, M01AE53, M02AA28, N02AJ14, M01AB15, S01BC05, S01FB51, M01AG04, M02AA18, M01AG01, M01AC06, M01AC56, M01AX01, G02CC02, M01AE02, M02AA12, M01AE52, M01AE56, M01AX17, M02AA26, M01AA01, M02AA01, M01BA01, M01AC01, M02AA07, S01BC06, M01AH02, A07EC, D02AF, J04AA, M02AC, N02BA, P02DA, J04AA01, D01AE12, S01BC08, N02BA06, M01AB02, M01AC02, M01AG02, M01AB03, M02AA21                                                                            |
| Antihypertensive          | C02, C03, C07, C08, C09                                                                                                                                                                                                                                                                                                                                                                                                                                                                                                                                                                                                                                                                                                                                                                                                                                                                                                                                                                           |
| Antidiabetic              | A10                                                                                                                                                                                                                                                                                                                                                                                                                                                                                                                                                                                                                                                                                                                                                                                                                                                                                                                                                                                               |
| Lipid-lowering            | C10AA, C10BA, C10BX, C10AB, C10AC, C10AD, C10AX                                                                                                                                                                                                                                                                                                                                                                                                                                                                                                                                                                                                                                                                                                                                                                                                                                                                                                                                                   |
| Antiplatelet              | B01AC, M03BC51, N02AB, N02BA01, N02BA51, N02BE01                                                                                                                                                                                                                                                                                                                                                                                                                                                                                                                                                                                                                                                                                                                                                                                                                                                                                                                                                  |
| Disease                   | ICD9 and ICD10                                                                                                                                                                                                                                                                                                                                                                                                                                                                                                                                                                                                                                                                                                                                                                                                                                                                                                                                                                                    |
| Liver disease             | 070, 570, 571, 572, 573                                                                                                                                                                                                                                                                                                                                                                                                                                                                                                                                                                                                                                                                                                                                                                                                                                                                                                                                                                           |
| Hypertension              | 401–405, 362.11                                                                                                                                                                                                                                                                                                                                                                                                                                                                                                                                                                                                                                                                                                                                                                                                                                                                                                                                                                                   |
| Dyslipidemia              | 272                                                                                                                                                                                                                                                                                                                                                                                                                                                                                                                                                                                                                                                                                                                                                                                                                                                                                                                                                                                               |
| Ischemic heart disease    | 410–414, 429.2, 429.7                                                                                                                                                                                                                                                                                                                                                                                                                                                                                                                                                                                                                                                                                                                                                                                                                                                                                                                                                                             |
| Alcohol intake            | 291, 303, 305.0, 357.5, 425.5, 535.3, 571.0, 571.1, 571.2, 571.3, 980.0                                                                                                                                                                                                                                                                                                                                                                                                                                                                                                                                                                                                                                                                                                                                                                                                                                                                                                                           |
| Heart failure             | 425, 428, 398.91, 402.01, 402.11, 402.91, 404.01, 404.03, 404.11, 404.13                                                                                                                                                                                                                                                                                                                                                                                                                                                                                                                                                                                                                                                                                                                                                                                                                                                                                                                          |
| Peripheral artery disease | 442, 443, 440.1–440.4, 440.8, 440.9, 444.2, 444.8, 444.9, 447.1–447.6, 557.1, 557.9                                                                                                                                                                                                                                                                                                                                                                                                                                                                                                                                                                                                                                                                                                                                                                                                                                                                                                               |
| Diabetes mellitus         | 250, 357.2, 362.0, 366.41                                                                                                                                                                                                                                                                                                                                                                                                                                                                                                                                                                                                                                                                                                                                                                                                                                                                                                                                                                         |

(Continued)

**Supplementary Table S1** (Continued)

| Outcomes               | ICD9 and 10                                                                                                                                                                                                                                         |
|------------------------|-----------------------------------------------------------------------------------------------------------------------------------------------------------------------------------------------------------------------------------------------------|
| Chronic kidney disease | 403, 404, 581, 582, 583, 585, 586, 587, 588, 589, 591, V56, 250.4, 271.4, 440.1, 442.1, 590.0, 590.2, 590.3, 590.8, 590.9, 593.0, 593.1, 593.2, 593.3, 593.4, 593.5, 593.7, 593.8, 593.9, 753.0, 753.1, 753.2, 753.6, 788.5, 274.10, 274.19, 446.21 |
| Peptic ulcer disease   | 531, 532, 533, 534                                                                                                                                                                                                                                  |

Abbreviations: NOAC, non-vitamin K antagonist oral anticoagulant; NSAIDs, nonsteroidal anti-inflammatory drugs.

**Supplementary Table S2** Use of OACs across the stroke severity in patients with AF

|                                         | OAC use, n (%)                   |              |              |                                      |            |              |                                    |            |              |
|-----------------------------------------|----------------------------------|--------------|--------------|--------------------------------------|------------|--------------|------------------------------------|------------|--------------|
|                                         | Mild stroke<br>n = 4,513 (42.1%) |              |              | Moderate stroke<br>n = 2,582 (23.6%) |            |              | Severe stroke<br>n = 3,861 (35.2%) |            |              |
|                                         | Early                            | Delayed      | No use       | Early                                | Delayed    | No use       | Early                              | Delayed    | No use       |
| Composite outcome analysis (n = 10,956) | 1307 (29.0)                      | 1,171 (25.9) | 2,035 (45.1) | 692 (26.8)                           | 572 (22.2) | 1,318 (51.0) | 843 (21.8)                         | 560 (14.5) | 2,458 (63.7) |

Abbreviation: OAC, oral anticoagulant.

**Supplementary Table S3** Use of antiplatelet treatment for strokes of varying severity in terms of the composite outcome before day-by-day matching

| Day | Mild                  |                     |       |                          |                     |              | Moderate            |                     |     |                        |                     |                | Severe                |                     |  |                          |                     |  |                     |                     |  |                        |                     |  |
|-----|-----------------------|---------------------|-------|--------------------------|---------------------|--------------|---------------------|---------------------|-----|------------------------|---------------------|----------------|-----------------------|---------------------|--|--------------------------|---------------------|--|---------------------|---------------------|--|------------------------|---------------------|--|
|     | Use of anticoagulants |                     |       | No use of anticoagulants |                     |              | Use of antiplatelet |                     |     | No use of antiplatelet |                     |                | Use of anticoagulants |                     |  | No use of anticoagulants |                     |  | Use of antiplatelet |                     |  | No use of antiplatelet |                     |  |
|     | N                     | Use of antiplatelet |       | N                        | Use of antiplatelet |              | N                   | Use of antiplatelet |     | N                      | Use of antiplatelet |                | N                     | Use of antiplatelet |  | N                        | Use of antiplatelet |  | N                   | Use of antiplatelet |  | N                      | Use of antiplatelet |  |
| 0   | 545                   | 274 (50.28%)        | 3,968 | 3,239 (81.63%)           | 200                 | 113 (56.5%)  | 2,382               | 1,957 (82.16%)      | 192 | 120 (62.5%)            | 3,669               | 3,131 (85.34%) |                       |                     |  |                          |                     |  |                     |                     |  |                        |                     |  |
| 1   | 393                   | 255 (64.89%)        | 3,545 | 2,963 (83.58%)           | 169                 | 103 (60.95%) | 2,176               | 1,830 (84.1%)       | 152 | 112 (73.68%)           | 3,452               | 2,981 (86.36%) |                       |                     |  |                          |                     |  |                     |                     |  |                        |                     |  |
| 2   | 200                   | 160 (80%)           | 3,324 | 2,791 (83.97%)           | 90                  | 65 (72.22%)  | 2,070               | 1,751 (84.59%)      | 78  | 52 (66.67%)            | 3,310               | 2,887 (87.22%) |                       |                     |  |                          |                     |  |                     |                     |  |                        |                     |  |
| 3   | 169                   | 140 (82.84%)        | 3,138 | 2,640 (84.13%)           | 74                  | 49 (66.22%)  | 1,974               | 1,687 (85.46%)      | 51  | 38 (74.51%)            | 3,163               | 2,775 (87.73%) |                       |                     |  |                          |                     |  |                     |                     |  |                        |                     |  |
| 4   | 131                   | 113 (86.26%)        | 2,993 | 2,517 (84.1%)            | 67                  | 55 (82.09%)  | 1,883               | 1,613 (85.66%)      | 58  | 38 (65.52%)            | 3,042               | 2,691 (88.46%) |                       |                     |  |                          |                     |  |                     |                     |  |                        |                     |  |
| 5   | 95                    | 72 (75.79%)         | 2,885 | 2,434 (84.37%)           | 37                  | 32 (86.49%)  | 1,833               | 1,571 (85.71%)      | 44  | 27 (61.36%)            | 2,938               | 2,614 (88.97%) |                       |                     |  |                          |                     |  |                     |                     |  |                        |                     |  |
| 6   | 83                    | 63 (75.9%)          | 2,785 | 2,364 (84.88%)           | 55                  | 42 (76.36%)  | 1,769               | 1,522 (86.04%)      | 46  | 39 (84.78%)            | 2,850               | 2,540 (89.12%) |                       |                     |  |                          |                     |  |                     |                     |  |                        |                     |  |
| 7   | 86                    | 69 (80.23%)         | 2,678 | 2,277 (85.03%)           | 50                  | 42 (84%)     | 1,702               | 1,464 (86.02%)      | 32  | 28 (87.5%)             | 2,788               | 2,485 (89.13%) |                       |                     |  |                          |                     |  |                     |                     |  |                        |                     |  |
| 8   | 61                    | 47 (77.05%)         | 2,605 | 2,224 (85.37%)           | 36                  | 35 (97.22%)  | 1,652               | 1,420 (85.96%)      | 45  | 39 (86.67%)            | 2,708               | 2,420 (89.36%) |                       |                     |  |                          |                     |  |                     |                     |  |                        |                     |  |
| 9   | 56                    | 51 (91.07%)         | 2,521 | 2,154 (85.44%)           | 35                  | 34 (97.14%)  | 1,605               | 1,379 (85.92%)      | 33  | 29 (87.88%)            | 2,644               | 2,366 (89.49%) |                       |                     |  |                          |                     |  |                     |                     |  |                        |                     |  |
| 10  | 59                    | 53 (89.83%)         | 2,429 | 2,078 (85.55%)           | 36                  | 33 (91.67%)  | 1,562               | 1,341 (85.85%)      | 38  | 36 (94.74%)            | 2,575               | 2,303 (89.44%) |                       |                     |  |                          |                     |  |                     |                     |  |                        |                     |  |
| 11  | 74                    | 61 (82.43%)         | 2,330 | 2,002 (85.92%)           | 36                  | 30 (83.33%)  | 1,512               | 1,302 (86.11%)      | 37  | 32 (86.49%)            | 2,513               | 2,251 (89.57%) |                       |                     |  |                          |                     |  |                     |                     |  |                        |                     |  |
| 12  | 58                    | 49 (84.48%)         | 2,245 | 1,932 (86.06%)           | 46                  | 42 (91.3%)   | 1,447               | 1,243 (85.9%)       | 37  | 32 (86.49%)            | 2,451               | 2,199 (89.72%) |                       |                     |  |                          |                     |  |                     |                     |  |                        |                     |  |
| 13  | 64                    | 55 (85.94%)         | 2,157 | 1,861 (86.28%)           | 50                  | 45 (90%)     | 1,382               | 1,189 (86.03%)      | 56  | 48 (85.71%)            | 2,378               | 2,136 (89.82%) |                       |                     |  |                          |                     |  |                     |                     |  |                        |                     |  |
| 14  | 87                    | 77 (88.51%)         | 2,046 | 1,768 (86.41%)           | 62                  | 57 (91.94%)  | 1,306               | 1,121 (85.83%)      | 96  | 88 (91.67%)            | 2,251               | 2,025 (89.96%) |                       |                     |  |                          |                     |  |                     |                     |  |                        |                     |  |
| 15  | 54                    | 52 (96.3%)          | 1,975 | 1,704 (86.28%)           | 33                  | 31 (93.94%)  | 1,252               | 1,071 (85.54%)      | 58  | 51 (87.93%)            | 2,164               | 1,947 (89.97%) |                       |                     |  |                          |                     |  |                     |                     |  |                        |                     |  |
| 16  | 42                    | 37 (88.1%)          | 1,920 | 1,661 (86.51%)           | 37                  | 35 (94.59%)  | 1,196               | 1,020 (85.28%)      | 51  | 43 (84.31%)            | 2,097               | 1,894 (90.32%) |                       |                     |  |                          |                     |  |                     |                     |  |                        |                     |  |
| 17  | 30                    | 28 (93.33%)         | 1,870 | 1,618 (86.52%)           | 23                  | 18 (78.26%)  | 1,158               | 995 (85.92%)        | 41  | 35 (85.37%)            | 2,037               | 1,842 (90.43%) |                       |                     |  |                          |                     |  |                     |                     |  |                        |                     |  |
| 18  | 21                    | 18 (85.71%)         | 1,825 | 1,585 (86.85%)           | 24                  | 23 (95.83%)  | 1,120               | 963 (85.98%)        | 35  | 32 (91.43%)            | 1,975               | 1,783 (90.28%) |                       |                     |  |                          |                     |  |                     |                     |  |                        |                     |  |
| 19  | 22                    | 21 (95.45%)         | 1,789 | 1,551 (86.7%)            | 26                  | 22 (84.62%)  | 1,079               | 930 (86.19%)        | 39  | 34 (87.18%)            | 1,919               | 1,735 (90.41%) |                       |                     |  |                          |                     |  |                     |                     |  |                        |                     |  |
| 20  | 19                    | 15 (78.95%)         | 1,763 | 1,534 (87.01%)           | 14                  | 11 (78.57%)  | 1,048               | 902 (86.07%)        | 32  | 30 (93.75%)            | 1,872               | 1,691 (90.33%) |                       |                     |  |                          |                     |  |                     |                     |  |                        |                     |  |
| 21  | 26                    | 19 (73.08%)         | 1,723 | 1,507 (87.46%)           | 9                   | 5 (55.56%)   | 1,029               | 888 (86.3%)         | 21  | 17 (80.95%)            | 1,830               | 1,657 (90.55%) |                       |                     |  |                          |                     |  |                     |                     |  |                        |                     |  |
| 22  | 20                    | 19 (95%)            | 1,695 | 1,486 (87.67%)           | 8                   | 8 (100%)     | 1,013               | 873 (86.18%)        | 17  | 15 (88.24%)            | 1,799               | 1,633 (90.77%) |                       |                     |  |                          |                     |  |                     |                     |  |                        |                     |  |
| 23  | 18                    | 15 (83.33%)         | 1,670 | 1,469 (87.96%)           | 10                  | 8 (80%)      | 996                 | 860 (86.35%)        | 23  | 23 (100%)              | 1,759               | 1,595 (90.68%) |                       |                     |  |                          |                     |  |                     |                     |  |                        |                     |  |
| 24  | 15                    | 13 (86.67%)         | 1,646 | 1,448 (87.97%)           | 4                   | 2 (50%)      | 979                 | 850 (86.82%)        | 15  | 14 (93.33%)            | 1,730               | 1,568 (90.64%) |                       |                     |  |                          |                     |  |                     |                     |  |                        |                     |  |
| 25  | 10                    | 9 (90%)             | 1,630 | 1,434 (87.98%)           | 9                   | 7 (77.78%)   | 958                 | 832 (86.85%)        | 20  | 20 (100%)              | 1,686               | 1,527 (90.57%) |                       |                     |  |                          |                     |  |                     |                     |  |                        |                     |  |
| 26  | 12                    | 10 (83.33%)         | 1,610 | 1,421 (88.26%)           | 6                   | 5 (83.33%)   | 946                 | 823 (87%)           | 13  | 12 (92.31%)            | 1,660               | 1,503 (90.54%) |                       |                     |  |                          |                     |  |                     |                     |  |                        |                     |  |
| 27  | 13                    | 8 (61.54%)          | 1,590 | 1,409 (88.62%)           | 3                   | 2 (66.67%)   | 933                 | 813 (87.14%)        | 11  | 9 (81.82%)             | 1,628               | 1,475 (90.6%)  |                       |                     |  |                          |                     |  |                     |                     |  |                        |                     |  |
| 28  | 7                     | 7 (100%)            | 1,570 | 1,394 (88.79%)           | 9                   | 9 (100%)     | 914                 | 799 (87.42%)        | 15  | 13 (86.67%)            | 1,598               | 1,452 (90.86%) |                       |                     |  |                          |                     |  |                     |                     |  |                        |                     |  |
| 29  | 8                     | 6 (75%)             | 1,551 | 1,381 (89.04%)           | 6                   | 6 (100%)     | 900                 | 789 (87.67%)        | 17  | 16 (94.12%)            | 1,554               | 1,411 (90.8%)  |                       |                     |  |                          |                     |  |                     |                     |  |                        |                     |  |

**Supplementary Table S4** Baseline characteristics of moderate stroke patients in terms of the composite outcome before and after 30 day-by-day matching

|                           | Unmatched       |                |         |                | Matched         |              |         |              | p-Value      |        |
|---------------------------|-----------------|----------------|---------|----------------|-----------------|--------------|---------|--------------|--------------|--------|
|                           | Early treatment | No treatment   | p-Value |                | Early treatment | No treatment | p-Value |              |              |        |
| Total                     | 692 (100%)      | 1,318 (100%)   |         | 1,318 (100%)   | 691 (100%)      | 691 (100%)   |         | 572 (100%)   | 572 (100%)   | 1      |
| Gender                    |                 |                | 0.7036  |                |                 |              | 0.1293  |              |              | 0.6667 |
| Female                    | 354 (51.16%)    | 686 (52.05%)   |         | 686 (52.05%)   | 354 (51.23%)    | 362 (52.39%) |         | 276 (48.25%) | 276 (48.25%) |        |
| Male                      | 338 (48.84%)    | 632 (47.95%)   |         | 632 (47.95%)   | 337 (48.77%)    | 329 (47.61%) |         | 296 (51.75%) | 296 (51.75%) |        |
| Age                       |                 |                | <0.0001 |                |                 |              | <0.0001 |              |              | 0.8565 |
| ≥80                       | 274 (39.6%)     | 782 (59.33%)   |         | 782 (59.33%)   | 274 (39.65%)    | 281 (40.67%) |         | 232 (40.56%) | 232 (40.56%) |        |
| 70-80                     | 222 (32.08%)    | 347 (26.33%)   |         | 347 (26.33%)   | 222 (32.13%)    | 224 (32.42%) |         | 162 (28.32%) | 162 (28.32%) |        |
| <70                       | 196 (28.32%)    | 189 (14.34%)   |         | 189 (14.34%)   | 195 (28.22%)    | 186 (26.92%) |         | 178 (31.12%) | 180 (31.47%) |        |
| <b>Medication history</b> |                 |                |         |                |                 |              |         |              |              |        |
| Antihypertensive          | 610 (88.15%)    | 1,110 (84.22%) | 0.0171  | 1,110 (84.22%) | 609 (88.13%)    | 601 (86.98%) | 0.8274  | 484 (84.62%) | 489 (85.49%) | 0.6784 |
| Antidiabetic              | 187 (27.02%)    | 349 (26.48%)   | 0.7934  | 349 (26.48%)   | 187 (27.06%)    | 163 (23.59%) | 0.4512  | 142 (24.83%) | 134 (23.43%) | 0.5804 |
| Lipid-lowering agents     | 135 (19.51%)    | 224 (17%)      | 0.1622  | 224 (17%)      | 134 (19.39%)    | 130 (18.81%) | 0.2418  | 110 (19.23%) | 111 (19.41%) | 0.9403 |
| Anticoagulant             | 292 (42.2%)     | 152 (11.53%)   | <0.0001 | 152 (11.53%)   | 291 (42.11%)    | 308 (44.57%) | <0.0001 | 128 (22.38%) | 126 (22.03%) | 0.8869 |
| Antiplatelet              | 294 (42.49%)    | 743 (56.37%)   | <0.0001 | 743 (56.37%)   | 294 (42.55%)    | 281 (40.67%) | 0.0007  | 274 (47.9%)  | 255 (44.58%) | 0.2599 |
| NSAID                     | 692 (100%)      | 1,315 (99.77%) | 1       | 1,315 (99.77%) | 691 (100%)      | 691 (100%)   | 0.8185  | 571 (99.83%) | 572 (100%)   | 1      |
| <b>Medical history</b>    |                 |                |         |                |                 |              |         |              |              |        |
| Liver disease             | 91 (13.15%)     | 178 (13.51%)   | 0.8242  | 178 (13.51%)   | 91 (13.17%)     | 85 (12.3%)   | 0.6619  | 73 (12.76%)  | 83 (14.51%)  | 0.3889 |
| Peptic ulcer disease      | 192 (27.75%)    | 448 (33.99%)   | 0.0043  | 448 (33.99%)   | 192 (27.79%)    | 189 (27.35%) | 0.019   | 163 (28.5%)  | 131 (22.9%)  | 0.0304 |
| Hypertension              | 530 (76.59%)    | 1,080 (81.94%) | 0.0043  | 1,080 (81.94%) | 530 (76.7%)     | 530 (76.7%)  | 0.0014  | 432 (75.52%) | 442 (77.27%) | 0.4863 |
| Dyslipidemia              | 235 (33.96%)    | 369 (28%)      | 0.0056  | 369 (28%)      | 235 (34.01%)    | 208 (30.1%)  | 0.005   | 197 (34.44%) | 195 (34.09%) | 0.9008 |
| IHD                       | 287 (41.47%)    | 602 (45.68%)   | 0.0716  | 602 (45.68%)   | 287 (41.53%)    | 275 (39.8%)  | 0.9853  | 261 (45.63%) | 264 (46.15%) | 0.8587 |
| ICH                       | 11 (1.59%)      | 51 (3.87%)     | 0.005   | 51 (3.87%)     | 11 (1.59%)      | 11 (1.59%)   | 0.1191  | 14 (2.45%)   | 14 (2.45%)   | 1      |
| TIA                       | 36 (5.2%)       | 74 (5.61%)     | 0.6994  | 74 (5.61%)     | 36 (5.21%)      | 37 (5.35%)   | 0.865   | 31 (5.42%)   | 25 (4.37%)   | 0.411  |
| Alcohol intoxication      | 3 (0.43%)       | 14 (1.06%)     | 0.1436  | 14 (1.06%)     | 3 (0.43%)       | 1 (0.14%)    | 0.7582  | 7 (1.22%)    | 6 (1.05%)    | 0.7803 |
| GI bleeding               | 78 (11.27%)     | 197 (14.95%)   | 0.0227  | 197 (14.95%)   | 78 (11.29%)     | 83 (12.01%)  | 0.0296  | 64 (11.19%)  | 61 (10.66%)  | 0.7762 |
| Hematuria                 | 35 (5.06%)      | 75 (5.69%)     | 0.5535  | 75 (5.69%)     | 35 (5.07%)      | 32 (4.63%)   | 0.4841  | 28 (4.9%)    | 27 (4.72%)   | 0.8901 |
| VTE                       | 22 (3.18%)      | 26 (1.97%)     | 0.0923  | 26 (1.97%)     | 21 (3.04%)      | 21 (3.04%)   | 0.3883  | 8 (1.4%)     | 7 (1.22%)    | 0.7949 |
| Systemic embolism         | 9 (1.3%)        | 44 (3.34%)     | 0.0067  | 44 (3.34%)     | 9 (1.3%)        | 13 (1.88%)   | 0.2133  | 13 (2.27%)   | 16 (2.8%)    | 0.5726 |
| CHF                       | 346 (50%)       | 642 (48.71%)   | 0.5826  | 642 (48.71%)   | 345 (49.93%)    | 350 (50.65%) | 0.0225  | 246 (43.01%) | 239 (41.78%) | 0.6754 |
|                           | 30 (4.34%)      | 111 (8.42%)    | 0.0007  | 111 (8.42%)    | 30 (4.34%)      | 22 (3.18%)   | 0.2926  | 40 (6.99%)   | 33 (5.77%)   | 0.3971 |

Supplementary Table S4 (Continued)

|                                  | Unmatched                                                                                                                 |              |               |                   |              | Matched       |                 |              |         |                   |              |         |
|----------------------------------|---------------------------------------------------------------------------------------------------------------------------|--------------|---------------|-------------------|--------------|---------------|-----------------|--------------|---------|-------------------|--------------|---------|
|                                  | Early treatment                                                                                                           | No treatment | p-Value       | Delayed treatment | No treatment | p-Value       | Early treatment | No treatment | p-Value | Delayed treatment | No treatment | p-Value |
| Myocardial infarction            |                                                                                                                           |              |               |                   |              |               |                 |              |         |                   |              |         |
| PVD                              | 54 (7.8%)                                                                                                                 | 124 (9.41%)  | 0.2289        | 37 (6.47%)        | 124 (9.41%)  | <b>0.0355</b> | 54 (7.81%)      | 58 (8.39%)   | 0.6934  | 37 (6.47%)        | 37 (6.47%)   | 1       |
| CVA                              | 383 (55.35%)                                                                                                              | 691 (52.43%) | 0.2126        | 306 (53.5%)       | 691 (52.43%) | 0.669         | 382 (55.28%)    | 375 (54.27%) | 0.7052  | 306 (53.5%)       | 313 (54.72%) | 0.6779  |
| Diabetes mellitus                | 236 (34.1%)                                                                                                               | 478 (36.27%) | 0.3357        | 193 (33.74%)      | 478 (36.27%) | 0.2918        | 236 (34.15%)    | 210 (30.39%) | 0.1347  | 193 (33.74%)      | 191 (33.39%) | 0.9004  |
| CKD                              | 190 (27.46%)                                                                                                              | 431 (32.7%)  | <b>0.0156</b> | 159 (27.8%)       | 431 (32.7%)  | <b>0.0345</b> | 190 (27.5%)     | 168 (24.31%) | 0.1768  | 159 (27.8%)       | 150 (26.22%) | 0.549   |
| Secondary prevention             |                                                                                                                           |              |               |                   |              |               |                 |              |         |                   |              |         |
| Anticoagulant                    |                                                                                                                           |              |               |                   |              |               |                 |              |         |                   |              |         |
| NOAC                             | 168 (24.28%)                                                                                                              | 0            |               | 322 (56.29%)      | 0            |               | 168 (24.31%)    | 0            |         | 322 (56.29%)      | 0            |         |
| Warfarin                         | 431 (62.28%)                                                                                                              | 0            |               | 227 (39.69%)      | 0            |               | 430 (62.23%)    | 0            |         | 227 (39.69%)      | 0            |         |
| Both                             | 93 (13.44%)                                                                                                               | 0            |               | 23 (4.02%)        | 0            |               | 93 (13.46%)     | 0            |         | 23 (4.02%)        | 0            |         |
| Antiplatelet (AIS to index date) | Reference to Supplementary Table 3, moderate stroke, 0–6th day for early treatment and 7th–29th day for delayed treatment |              |               |                   |              |               |                 |              |         |                   |              |         |
|                                  |                                                                                                                           |              |               |                   |              |               | 459 (66.43%)    | 456 (65.99%) | 0.8645  | 510 (89.16%)      | 524 (91.61%) | 0.1603  |

Abbreviations: AIS, acute ischemic stroke; CHF, congestive heart failure; CKD, chronic kidney disease; CVA, cerebrovascular accident; GI, gastrointestinal; ICH, intracranial hemorrhage; IHD, ischemic heart disease; NOAC, non-vitamin K antagonist oral anticoagulant; NSAIDs, nonsteroidal anti-inflammatory drugs; PVD, peripheral vascular disease; TIA, transient ischemic attack; VTE, venous thromboembolism. Note: Data are mean ± standard deviation (SD) or n (%).

**Supplementary Table S5** Baseline characteristics of severe stroke patients in terms of the composite outcome before and after 30 day-by-day matching

|                           | Unmatched       |                |                   |                | Matched |                 |              |                   | p-Value      |
|---------------------------|-----------------|----------------|-------------------|----------------|---------|-----------------|--------------|-------------------|--------------|
|                           | Early treatment | No treatment   | Delayed treatment | No treatment   | p-Value | Early treatment | No treatment | Delayed treatment |              |
| Total                     | 843 (100%)      | 2,458 (100%)   | 560 (100%)        | 2,458 (100%)   |         | 843 (100%)      | 843 (100%)   | 560 (100%)        | 560 (100%)   |
| Gender                    |                 |                |                   |                | 0.7881  |                 |              |                   | 0.6558       |
| Female                    | 493 (58.48%)    | 1,433 (58.3%)  | 323 (57.68%)      | 1,433 (58.3%)  |         | 493 (58.48%)    | 493 (58.48%) | 323 (57.68%)      | 327 (58.39%) |
| Male                      | 350 (41.52%)    | 1,025 (41.7%)  | 237 (42.32%)      | 1,025 (41.7%)  |         | 350 (41.52%)    | 350 (41.52%) | 237 (42.32%)      | 233 (41.61%) |
| Age                       |                 |                |                   |                | <0.0001 |                 |              |                   | 0.5773       |
| ≥80                       | 344 (40.81%)    | 1,277 (51.95%) | 229 (40.89%)      | 1,277 (51.95%) |         | 344 (40.81%)    | 344 (40.81%) | 229 (40.89%)      | 233 (41.61%) |
| 70-80                     | 288 (34.16%)    | 767 (31.2%)    | 187 (33.39%)      | 767 (31.2%)    |         | 288 (34.16%)    | 288 (34.16%) | 187 (33.39%)      | 195 (34.82%) |
| <70                       | 211 (25.03%)    | 414 (16.84%)   | 144 (25.71%)      | 414 (16.84%)   |         | 211 (25.03%)    | 211 (25.03%) | 144 (25.71%)      | 132 (23.57%) |
| <b>Medication history</b> |                 |                |                   |                |         |                 |              |                   |              |
| Antihypertensive          | 745 (88.37%)    | 2,133 (86.78%) | 480 (85.71%)      | 2,133 (86.78%) | 0.5052  | 745 (88.37%)    | 749 (88.85%) | 480 (85.71%)      | 481 (85.89%) |
| Antidiabetic              | 242 (28.71%)    | 683 (27.79%)   | 125 (22.32%)      | 683 (27.79%)   | 0.0084  | 242 (28.71%)    | 247 (29.3%)  | 125 (22.32%)      | 123 (21.96%) |
| Lipid-lowering agents     | 176 (20.88%)    | 453 (18.43%)   | 128 (22.86%)      | 453 (18.43%)   | 0.0165  | 176 (20.88%)    | 179 (21.23%) | 128 (22.86%)      | 123 (21.96%) |
| Anticoagulant             | 333 (39.5%)     | 352 (14.32%)   | 119 (21.25%)      | 352 (14.32%)   | <0.0001 | 333 (39.5%)     | 311 (36.89%) | 119 (21.25%)      | 131 (23.39%) |
| Antiplatelet              | 373 (44.25%)    | 1,355 (55.13%) | 234 (41.79%)      | 1,355 (55.13%) | <0.0001 | 373 (44.25%)    | 376 (44.6%)  | 234 (41.79%)      | 221 (39.46%) |
| NSAIDs                    | 841 (99.76%)    | 2,446 (99.51%) | 559 (99.82%)      | 2,446 (99.51%) | 0.3126  | 841 (99.76%)    | 841 (99.76%) | 559 (99.82%)      | 560 (100%)   |
| <b>Medical history</b>    |                 |                |                   |                |         |                 |              |                   |              |
| Liver disease             | 105 (12.46%)    | 275 (11.19%)   | 64 (11.43%)       | 275 (11.19%)   | 0.8707  | 105 (12.46%)    | 85 (10.08%)  | 64 (11.43%)       | 65 (11.61%)  |
| Peptic ulcer disease      | 239 (28.35%)    | 761 (30.96%)   | 134 (23.93%)      | 761 (30.96%)   | 0.001   | 239 (28.35%)    | 231 (27.4%)  | 134 (23.93%)      | 127 (22.68%) |
| Hypertension              | 653 (77.46%)    | 2,002 (81.45%) | 433 (77.32%)      | 2,002 (81.45%) | 0.0256  | 653 (77.46%)    | 657 (77.94%) | 433 (77.32%)      | 432 (77.14%) |
| Dyslipidemia              | 272 (32.27%)    | 724 (29.45%)   | 188 (33.57%)      | 724 (29.45%)   | 0.0556  | 272 (32.27%)    | 262 (31.08%) | 188 (33.57%)      | 194 (34.64%) |
| IHD                       | 340 (40.33%)    | 1,138 (46.3%)  | 220 (39.29%)      | 1,138 (46.3%)  | 0.0026  | 340 (40.33%)    | 317 (37.6%)  | 220 (39.29%)      | 213 (38.04%) |
| ICH                       | 21 (2.49%)      | 64 (2.6%)      | 12 (2.14%)        | 64 (2.6%)      | 0.5299  | 21 (2.49%)      | 26 (3.08%)   | 12 (2.14%)        | 16 (2.86%)   |
| TIA                       | 44 (5.22%)      | 111 (4.52%)    | 19 (3.39%)        | 111 (4.52%)    | 0.2375  | 44 (5.22%)      | 37 (4.39%)   | 19 (3.39%)        | 16 (2.86%)   |
| Alcohol intoxication      | 6 (0.71%)       | 21 (0.85%)     | 6 (1.07%)         | 21 (0.85%)     | 0.6225  | 6 (0.71%)       | 6 (0.71%)    | 6 (1.07%)         | 5 (0.89%)    |
| GI bleeding               | 74 (8.78%)      | 283 (11.51%)   | 48 (8.57%)        | 283 (11.51%)   | 0.0444  | 74 (8.78%)      | 68 (8.07%)   | 48 (8.57%)        | 38 (6.79%)   |
| Hematuria                 | 34 (4.03%)      | 84 (3.42%)     | 23 (4.11%)        | 84 (3.42%)     | 0.4257  | 34 (4.03%)      | 32 (3.8%)    | 23 (4.11%)        | 23 (4.11%)   |
| VTE                       | 25 (2.97%)      | 52 (2.12%)     | 10 (1.79%)        | 52 (2.12%)     | 0.6195  | 25 (2.97%)      | 20 (2.37%)   | 10 (1.79%)        | 7 (1.25%)    |
| Systemic embolism         | 25 (2.97%)      | 86 (3.5%)      | 12 (2.14%)        | 86 (3.5%)      | 0.1023  | 25 (2.97%)      | 19 (2.25%)   | 12 (2.14%)        | 13 (2.32%)   |
| CHF                       | 442 (52.43%)    | 1,210 (49.23%) | 250 (44.64%)      | 1,210 (49.23%) | 0.0501  | 442 (52.43%)    | 432 (51.25%) | 250 (44.64%)      | 254 (45.36%) |
| Myocardial infarction     | 61 (7.24%)      | 197 (8.01%)    | 29 (5.18%)        | 197 (8.01%)    | 0.0214  | 61 (7.24%)      | 62 (7.35%)   | 29 (5.18%)        | 26 (4.64%)   |
| PVD                       | 72 (8.54%)      | 253 (10.29%)   | 35 (6.25%)        | 253 (10.29%)   | 0.0033  | 72 (8.54%)      | 69 (8.19%)   | 35 (6.25%)        | 44 (7.86%)   |
| CVA                       | 490 (58.13%)    | 1,438 (58.5%)  | 379 (67.68%)      | 1,438 (58.5%)  | <0.0001 | 490 (58.13%)    | 491 (58.24%) | 379 (67.68%)      | 386 (68.93%) |

Supplementary Table S5 (Continued)

|                                  | Unmatched                                                                                                                 |              |         |                   | Matched      |                 |              |              | p-Value |              |              |        |
|----------------------------------|---------------------------------------------------------------------------------------------------------------------------|--------------|---------|-------------------|--------------|-----------------|--------------|--------------|---------|--------------|--------------|--------|
|                                  | Early treatment                                                                                                           | No treatment | p-Value | Delayed treatment | No treatment | Early treatment | No treatment | p-Value      |         |              |              |        |
| Diabetes mellitus                | 293 (34.76%)                                                                                                              | 893 (36.33%) | 0.4113  | 173 (30.89%)      | 893 (36.33%) | 0.0151          | 293 (34.76%) | 291 (34.52%) | 0.9185  | 173 (30.89%) | 161 (28.75%) | 0.4332 |
| CKD                              | 221 (26.22%)                                                                                                              | 736 (29.94%) | 0.0396  | 133 (23.75%)      | 736 (29.94%) | 0.0035          | 221 (26.22%) | 221 (26.22%) | 1       | 133 (23.75%) | 132 (23.57%) | 0.9439 |
| Secondary prevention             |                                                                                                                           |              |         |                   |              |                 |              |              |         |              |              |        |
| Anticoagulant                    |                                                                                                                           |              |         |                   |              |                 |              |              |         |              |              |        |
| NOAC                             | 166 (19.69%)                                                                                                              | 0            |         | 312 (55.71%)      | 0            |                 | 166 (19.69%) | 0            |         | 312 (55.71%) | 0            |        |
| Warfarin                         | 580 (68.8%)                                                                                                               | 0            |         | 235 (41.96%)      | 0            |                 | 580 (68.8%)  | 0            |         | 235 (41.96%) | 0            |        |
| Both                             | 97 (11.51%)                                                                                                               | 0            |         | 13 (2.32%)        | 0            |                 | 97 (11.51%)  | 0            |         | 13 (2.32%)   | 0            |        |
| Antiplatelet (AIS to index date) | Reference to Supplementary Table 3, severe stroke, 0–12th day for early treatment and 13th–29th day for delayed treatment |              |         |                   |              |                 | 622 (73.78%) | 619 (73.43%) | 0.8683  | 500 (89.29%) | 502 (89.64%) | 0.8457 |

Abbreviations: AIS, acute ischemic stroke; CHF, congestive heart failure; CKD, chronic kidney disease; CVA, cerebrovascular accident; GI, gastrointestinal; ICH, intracranial hemorrhage; IHD, ischemic heart disease; NOAC, non-vitamin K antagonist oral anticoagulant; NSAIDs, nonsteroidal anti-inflammatory drugs; PVD, peripheral vascular disease; TIA, transient ischemic attack; VTE, venous thromboembolism. Note: Data are mean  $\pm$  standard deviation (SD) or  $n$  (%).

**Supplementary Table S6** Baseline characteristics of mild stroke patients in terms of the effectiveness outcome before and after 30 day-by-day matching

|                           | Unmatched       |                |         |                   | Matched         |                |                |                   | p-Value |
|---------------------------|-----------------|----------------|---------|-------------------|-----------------|----------------|----------------|-------------------|---------|
|                           | Early treatment | No treatment   | p-Value | Delayed treatment | Early treatment | No treatment   | p-Value        | Delayed treatment |         |
| Total                     | 1,325 (100%)    | 2,091 (100%)   | 0.4496  | 1,198 (100%)      | 2,091 (100%)    | 1,325 (100%)   | 1,198 (100%)   | 1,198 (100%)      | 0.8034  |
| Gender                    |                 |                |         |                   |                 |                |                |                   |         |
| Female                    | 603 (45.51%)    | 924 (44.19%)   | 0.132   | 497 (41.49%)      | 603 (45.51%)    | 568 (42.87%)   | 497 (41.49%)   | 491 (40.98%)      |         |
| Male                      | 722 (54.49%)    | 1167 (55.81%)  |         | 701 (58.51%)      | 722 (54.49%)    | 757 (57.13%)   | 701 (58.51%)   | 707 (59.02%)      |         |
| Age                       |                 |                | <0.0001 |                   |                 |                |                |                   | 0.439   |
| ≥80                       | 441 (33.28%)    | 949 (45.38%)   |         | 396 (33.06%)      | 441 (33.28%)    | 435 (32.83%)   | 396 (33.06%)   | 421 (35.14%)      |         |
| 70-80                     | 477 (36%)       | 673 (32.19%)   |         | 435 (36.31%)      | 477 (36%)       | 489 (36.91%)   | 435 (36.31%)   | 435 (36.31%)      |         |
| <70                       | 407 (30.72%)    | 469 (22.43%)   |         | 367 (30.63%)      | 407 (30.72%)    | 401 (30.26%)   | 367 (30.63%)   | 342 (28.55%)      |         |
| <b>Medication history</b> |                 |                |         |                   |                 |                |                |                   |         |
| Antihypertensive          | 1,175 (88.68%)  | 1,818 (86.94%) | 0.1335  | 1,015 (84.72%)    | 1,818 (86.94%)  | 1,174 (88.6%)  | 1,015 (84.72%) | 1,004 (83.81%)    | 0.5371  |
| Antidiabetic              | 372 (28.08%)    | 614 (29.36%)   | 0.4181  | 306 (25.54%)      | 614 (29.36%)    | 362 (27.32%)   | 306 (25.54%)   | 293 (24.46%)      | 0.5397  |
| Lipid-lowering agents     | 313 (23.62%)    | 433 (20.71%)   | 0.0445  | 285 (23.79%)      | 433 (20.71%)    | 281 (21.21%)   | 285 (23.79%)   | 291 (24.29%)      | 0.7742  |
| Anticoagulant             | 636 (48%)       | 242 (11.57%)   | <0.0001 | 280 (23.37%)      | 242 (11.57%)    | 633 (47.77%)   | 280 (23.37%)   | 274 (22.87%)      | 0.7713  |
| Antiplatelet              | 606 (45.74%)    | 1,227 (58.68%) | <0.0001 | 638 (53.26%)      | 1,227 (58.68%)  | 616 (46.49%)   | 638 (53.26%)   | 636 (53.09%)      | 0.9347  |
| NSAIDs                    | 1,325 (100%)    | 2,088 (99.86%) | 1       | 1,198 (100%)      | 2,088 (99.86%)  | 1,325 (100%)   | 1,198 (100%)   | 1,198 (100%)      | 0.3177  |
| <b>Medical history</b>    |                 |                |         |                   |                 |                |                |                   |         |
| Liver disease             | 181 (13.66%)    | 313 (14.97%)   | 0.2893  | 196 (16.36%)      | 313 (14.97%)    | 174 (13.13%)   | 196 (16.36%)   | 161 (13.44%)      | 0.0446  |
| Peptic ulcer disease      | 362 (27.32%)    | 732 (35.01%)   | <0.0001 | 354 (29.55%)      | 732 (35.01%)    | 361 (27.25%)   | 354 (29.55%)   | 317 (26.46%)      | 0.0923  |
| Hypertension              | 1,041 (78.57%)  | 1,743 (83.36%) | 0.0004  | 946 (78.96%)      | 1,743 (83.36%)  | 1,057 (79.77%) | 946 (78.96%)   | 960 (80.13%)      | 0.4783  |
| Dyslipidemia              | 461 (34.79%)    | 724 (34.62%)   | 0.92    | 426 (35.56%)      | 724 (34.62%)    | 452 (34.11%)   | 426 (35.56%)   | 409 (34.14%)      | 0.4661  |
| IHD                       | 626 (47.25%)    | 1,055 (50.45%) | 0.0675  | 557 (46.49%)      | 1,055 (50.45%)  | 625 (47.17%)   | 557 (46.49%)   | 544 (45.41%)      | 0.5941  |
| ICH                       | 26 (1.96%)      | 65 (3.11%)     | 0.0426  | 21 (1.75%)        | 65 (3.11%)      | 27 (2.04%)     | 21 (1.75%)     | 21 (1.75%)        | 1       |
| TIA                       | 97 (7.32%)      | 163 (7.8%)     | 0.6103  | 76 (6.34%)        | 163 (7.8%)      | 93 (7.02%)     | 76 (6.34%)     | 69 (5.76%)        | 0.5487  |
| Alcohol intoxication      | 10 (0.75%)      | 25 (1.2%)      | 0.2125  | 10 (0.83%)        | 25 (1.2%)       | 16 (1.21%)     | 10 (0.83%)     | 6 (0.5%)          | 0.3157  |
| GI bleeding               | 129 (9.74%)     | 304 (14.54%)   | <0.0001 | 123 (10.27%)      | 304 (14.54%)    | 124 (9.36%)    | 123 (10.27%)   | 109 (9.1%)        | 0.3335  |
| Hematuria                 | 65 (4.91%)      | 95 (4.54%)     | 0.6252  | 62 (5.18%)        | 95 (4.54%)      | 69 (5.21%)     | 62 (5.18%)     | 65 (5.43%)        | 0.7844  |
| VTE                       | 27 (2.04%)      | 33 (1.58%)     | 0.3191  | 18 (1.5%)         | 33 (1.58%)      | 27 (2.04%)     | 18 (1.5%)      | 14 (1.17%)        | 0.4765  |
| Systemic embolism         | 29 (2.19%)      | 66 (3.16%)     | 0.0937  | 29 (2.42%)        | 66 (3.16%)      | 30 (2.26%)     | 29 (2.42%)     | 27 (2.25%)        | 0.7868  |
| CHF                       | 612 (46.19%)    | 943 (45.1%)    | 0.5328  | 459 (38.31%)      | 943 (45.1%)     | 607 (45.81%)   | 459 (38.31%)   | 470 (39.23%)      | 0.6446  |
| Myocardial infarction     | 90 (6.79%)      | 198 (9.47%)    | 0.0061  | 70 (5.84%)        | 198 (9.47%)     | 81 (6.11%)     | 70 (5.84%)     | 63 (5.26%)        | 0.5323  |
| PVD                       | 108 (8.15%)     | 213 (10.19%)   | 0.0469  | 79 (6.59%)        | 213 (10.19%)    | 112 (8.45%)    | 79 (6.59%)     | 66 (5.51%)        | 0.2654  |
| CVA                       | 616 (46.49%)    | 977 (46.72%)   | 0.894   | 567 (47.33%)      | 977 (46.72%)    | 610 (46.04%)   | 567 (47.33%)   | 559 (46.66%)      | 0.7433  |
| Diabetes mellitus         | 466 (35.17%)    | 821 (39.26%)   | 0.0161  | 401 (33.47%)      | 821 (39.26%)    | 474 (35.77%)   | 401 (33.47%)   | 374 (31.22%)      | 0.2383  |
| CKD                       | 368 (27.77%)    | 701 (33.52%)   | 0.0004  | 310 (25.88%)      | 701 (33.52%)    | 378 (28.53%)   | 310 (25.88%)   | 299 (24.96%)      | 0.6058  |



**Supplementary Table S6 (Continued)**

|                                  | Unmatched                                                                                                             |              |         | Matched           |              |         | p-Value | p-Value      |                 |              |                |                |         |
|----------------------------------|-----------------------------------------------------------------------------------------------------------------------|--------------|---------|-------------------|--------------|---------|---------|--------------|-----------------|--------------|----------------|----------------|---------|
|                                  | Early treatment                                                                                                       | No treatment | p-Value | Delayed treatment | No treatment | p-Value |         |              | Early treatment | No treatment | p-Value        | No treatment   | p-Value |
| Secondary prevention             |                                                                                                                       |              |         |                   |              |         |         |              |                 |              |                |                |         |
| Anticoagulant                    |                                                                                                                       |              |         |                   |              |         |         |              |                 |              |                |                |         |
| NOAC                             | 361 (27.25%)                                                                                                          | 0            |         | 680 (56.76%)      | 0            |         |         | 361 (27.25%) | 0               |              | 680 (56.76%)   | 0              |         |
| Warfarin                         | 821 (61.96%)                                                                                                          | 0            |         | 459 (38.31%)      | 0            |         |         | 821 (61.96%) | 0               |              | 459 (38.31%)   | 0              |         |
| Both                             | 143 (10.79%)                                                                                                          | 0            |         | 59 (4.92%)        | 0            |         |         | 143 (10.79%) | 0               |              | 59 (4.92%)     | 0              |         |
| Antiplatelet (AIS to index date) | Reference to Supplementary Table 7, mild stroke, 0–3rd day for early treatment and 4th–29th day for delayed treatment |              |         |                   |              |         |         |              |                 |              |                |                |         |
|                                  |                                                                                                                       |              |         |                   |              |         |         | 838 (63.25%) | 830 (62.64%)    | 0.7476       | 1,009 (84.22%) | 1,000 (83.47%) | 0.6173  |

Abbreviations: AIS, acute ischemic stroke; CHF, congestive heart failure; CKD, chronic kidney disease; CVA, cerebrovascular accident; GI, gastrointestinal; ICH, intracranial hemorrhage; IHD, ischemic heart disease; NOAC, non-vitamin K antagonist oral anticoagulant; NSAIDs, nonsteroidal anti-inflammatory drugs; PVD, peripheral vascular disease; TIA, transient ischemic attack; VTE, venous thromboembolism. Note: Data are mean ± standard deviation (SD) or n (%).

**Supplementary Table S7** Use of antiplatelet treatment for strokes of varying severity in terms of the effectiveness outcome before day-by-day matching

| Day | Mild                  |              |                          |                | Moderate            |              |                       |                | Severe              |              |                       |                |                     |   |
|-----|-----------------------|--------------|--------------------------|----------------|---------------------|--------------|-----------------------|----------------|---------------------|--------------|-----------------------|----------------|---------------------|---|
|     | Use of anticoagulants |              | No use of anticoagulants |                | Use of antiplatelet |              | Use of anticoagulants |                | Use of antiplatelet |              | Use of anticoagulants |                | Use of antiplatelet |   |
|     | N                     | %            | N                        | %              | N                   | %            | N                     | %              | N                   | %            | N                     | %              | N                   | % |
| 0   | 554                   | 279 (50.36%) | 4,060                    | 3,309 (81.5%)  | 205                 | 114 (55.61%) | 2,514                 | 2,055 (81.74%) | 206                 | 130 (63.11%) | 3,990                 | 3,417 (85.64%) |                     |   |
| 1   | 400                   | 258 (64.5%)  | 3,630                    | 3,030 (83.47%) | 179                 | 111 (62.01%) | 2,298                 | 1,920 (83.55%) | 157                 | 115 (73.25%) | 3,765                 | 3,263 (86.67%) |                     |   |
| 2   | 201                   | 161 (80.1%)  | 3,408                    | 2,856 (83.8%)  | 95                  | 69 (72.63%)  | 2,183                 | 1,835 (84.06%) | 83                  | 56 (67.47%)  | 3,613                 | 3,162 (87.52%) |                     |   |
| 3   | 170                   | 140 (82.35%) | 3,220                    | 2,704 (83.98%) | 76                  | 51 (67.11%)  | 2,084                 | 1,768 (84.84%) | 54                  | 40 (74.07%)  | 3,456                 | 3,043 (88.05%) |                     |   |
| 4   | 135                   | 116 (85.93%) | 3,071                    | 2,578 (83.95%) | 71                  | 58 (81.69%)  | 1,988                 | 1,690 (85.01%) | 63                  | 43 (68.25%)  | 3,324                 | 2,949 (88.72%) |                     |   |
| 5   | 96                    | 73 (76.04%)  | 2,964                    | 2,496 (84.21%) | 39                  | 34 (87.18%)  | 1,936                 | 1,646 (85.02%) | 46                  | 28 (60.87%)  | 3,217                 | 2,870 (89.21%) |                     |   |
| 6   | 83                    | 63 (75.9%)   | 2,866                    | 2,427 (84.68%) | 58                  | 44 (75.86%)  | 1,869                 | 1,595 (85.34%) | 51                  | 44 (86.27%)  | 3,123                 | 2,790 (89.34%) |                     |   |
| 7   | 87                    | 70 (80.46%)  | 2,758                    | 2,339 (84.81%) | 52                  | 44 (84.62%)  | 1,800                 | 1,535 (85.28%) | 36                  | 32 (88.89%)  | 3,056                 | 2,730 (89.33%) |                     |   |
| 8   | 61                    | 47 (77.05%)  | 2,686                    | 2,287 (85.15%) | 36                  | 35 (97.22%)  | 1,754                 | 1,493 (85.12%) | 48                  | 42 (87.5%)   | 2,974                 | 2,662 (89.51%) |                     |   |
| 9   | 58                    | 52 (89.66%)  | 2,601                    | 2,217 (85.24%) | 35                  | 34 (97.14%)  | 1,707                 | 1,453 (85.12%) | 38                  | 33 (86.84%)  | 2,904                 | 2,603 (89.63%) |                     |   |
| 10  | 61                    | 54 (88.52%)  | 2,508                    | 2,141 (85.37%) | 36                  | 33 (91.67%)  | 1,663                 | 1,414 (85.03%) | 39                  | 37 (94.87%)  | 2,835                 | 2,540 (89.59%) |                     |   |
| 11  | 74                    | 61 (82.43%)  | 2,412                    | 2,068 (85.74%) | 40                  | 34 (85%)     | 1,611                 | 1,372 (85.16%) | 38                  | 33 (86.84%)  | 2,772                 | 2,487 (89.72%) |                     |   |
| 12  | 60                    | 51 (85%)     | 2,334                    | 2,005 (85.9%)  | 50                  | 46 (92%)     | 1,545                 | 1,313 (84.98%) | 40                  | 35 (87.5%)   | 2,704                 | 2,429 (89.83%) |                     |   |
| 13  | 64                    | 55 (85.94%)  | 2,251                    | 1,940 (86.18%) | 53                  | 46 (86.79%)  | 1,478                 | 1,258 (85.12%) | 64                  | 56 (87.5%)   | 2,625                 | 2,359 (89.87%) |                     |   |
| 14  | 90                    | 80 (88.89%)  | 2,141                    | 1,848 (86.31%) | 63                  | 58 (92.06%)  | 1,400                 | 1,189 (84.93%) | 106                 | 98 (92.45%)  | 2,488                 | 2,238 (89.95%) |                     |   |
| 15  | 57                    | 55 (96.49%)  | 2,068                    | 1,782 (86.17%) | 35                  | 33 (94.29%)  | 1,348                 | 1,141 (84.64%) | 61                  | 52 (85.25%)  | 2,399                 | 2,160 (90.04%) |                     |   |
| 16  | 42                    | 37 (88.1%)   | 2,015                    | 1,741 (86.4%)  | 38                  | 35 (92.11%)  | 1,290                 | 1,090 (84.5%)  | 56                  | 48 (85.71%)  | 2,328                 | 2,102 (90.29%) |                     |   |
| 17  | 32                    | 30 (93.75%)  | 1,967                    | 1,699 (86.38%) | 23                  | 18 (78.26%)  | 1,254                 | 1,067 (85.09%) | 45                  | 39 (86.67%)  | 2,265                 | 2,048 (90.42%) |                     |   |
| 18  | 23                    | 19 (82.61%)  | 1,923                    | 1,666 (86.64%) | 25                  | 24 (96%)     | 1,216                 | 1,035 (85.12%) | 36                  | 33 (91.67%)  | 2,204                 | 1,990 (90.29%) |                     |   |
| 19  | 22                    | 21 (95.45%)  | 1,890                    | 1,635 (86.51%) | 27                  | 23 (85.19%)  | 1,175                 | 1,002 (85.28%) | 41                  | 36 (87.8%)   | 2,146                 | 1,940 (90.4%)  |                     |   |
| 20  | 19                    | 15 (78.95%)  | 1,864                    | 1,618 (86.8%)  | 15                  | 12 (80%)     | 1,146                 | 976 (85.17%)   | 33                  | 31 (93.94%)  | 2,098                 | 1,895 (90.32%) |                     |   |
| 21  | 26                    | 19 (73.08%)  | 1,826                    | 1,594 (87.29%) | 9                   | 5 (55.56%)   | 1,127                 | 962 (85.36%)   | 23                  | 19 (82.61%)  | 2,053                 | 1,858 (90.5%)  |                     |   |
| 22  | 20                    | 19 (95%)     | 1,800                    | 1,573 (87.39%) | 10                  | 9 (90%)      | 1,112                 | 949 (85.34%)   | 17                  | 15 (88.24%)  | 2,020                 | 1,832 (90.69%) |                     |   |
| 23  | 19                    | 16 (84.21%)  | 1,774                    | 1,555 (87.66%) | 10                  | 8 (80%)      | 1,093                 | 934 (85.45%)   | 24                  | 24 (100%)    | 1,981                 | 1,796 (90.66%) |                     |   |
| 24  | 17                    | 14 (82.35%)  | 1,751                    | 1,535 (87.66%) | 8                   | 5 (62.5%)    | 1,075                 | 923 (85.86%)   | 16                  | 15 (93.75%)  | 1,950                 | 1,767 (90.62%) |                     |   |
| 25  | 12                    | 11 (91.67%)  | 1,733                    | 1,519 (87.65%) | 9                   | 7 (77.78%)   | 1,056                 | 907 (85.89%)   | 23                  | 22 (95.65%)  | 1,904                 | 1,725 (90.6%)  |                     |   |
| 26  | 12                    | 10 (83.33%)  | 1,715                    | 1,507 (87.87%) | 6                   | 5 (83.33%)   | 1,043                 | 897 (86%)      | 15                  | 14 (93.33%)  | 1,872                 | 1,695 (90.54%) |                     |   |
| 27  | 13                    | 8 (61.54%)   | 1,698                    | 1,498 (88.22%) | 3                   | 2 (66.67%)   | 1,033                 | 889 (86.06%)   | 11                  | 9 (81.82%)   | 1,841                 | 1,668 (90.6%)  |                     |   |
| 28  | 7                     | 7 (100%)     | 1,680                    | 1,484 (88.33%) | 12                  | 12 (100%)    | 1,010                 | 872 (86.34%)   | 15                  | 13 (86.67%)  | 1,811                 | 1,644 (90.78%) |                     |   |
| 29  | 8                     | 6 (75%)      | 1,662                    | 1,471 (88.51%) | 8                   | 7 (87.5%)    | 998                   | 864 (86.57%)   | 21                  | 19 (90.48%)  | 1,766                 | 1,602 (90.71%) |                     |   |

**Supplementary Table S8** Baseline characteristics of moderate stroke patients in terms of the effectiveness outcome before and after 30 day-by-day matching

|                       | Unmatched       |                |         | Matched           |                |         | p-Value      | No treatment | Delayed treatment | p-Value      | No treatment | Delayed treatment | p-Value | No treatment | p-Value |
|-----------------------|-----------------|----------------|---------|-------------------|----------------|---------|--------------|--------------|-------------------|--------------|--------------|-------------------|---------|--------------|---------|
|                       | Early treatment | No treatment   | p-Value | Delayed treatment | No treatment   | p-Value |              |              |                   |              |              |                   |         |              |         |
| Total                 | 723 (100%)      | 1,393 (100%)   | 0.6826  | 603 (100%)        | 1,393 (100%)   | 0.0454  | 723 (100%)   | 723 (100%)   | 0.6358            | 602 (100%)   | 602 (100%)   | 0.954             |         |              |         |
| Gender                |                 |                |         |                   |                |         |              |              |                   |              |              |                   |         |              |         |
| Female                | 369 (51.04%)    | 724 (51.97%)   |         | 284 (47.1%)       | 724 (51.97%)   |         | 369 (51.04%) | 378 (52.28%) |                   | 284 (47.18%) | 283 (47.01%) |                   |         |              |         |
| Male                  | 354 (48.96%)    | 669 (48.03%)   |         | 319 (52.9%)       | 669 (48.03%)   |         | 354 (48.96%) | 345 (47.72%) |                   | 318 (52.82%) | 319 (52.99%) |                   |         |              |         |
| Age                   |                 |                | <0.0001 |                   |                | <0.0001 |              |              |                   |              |              |                   |         |              | 0.918   |
| ≥80                   | 290 (40.11%)    | 829 (59.51%)   |         | 249 (41.29%)      | 829 (59.51%)   |         | 290 (40.11%) | 310 (42.88%) |                   | 248 (41.2%)  | 254 (42.19%) |                   |         |              |         |
| 70-80                 | 233 (32.23%)    | 365 (26.2%)    |         | 170 (28.19%)      | 365 (26.2%)    |         | 233 (32.23%) | 224 (30.98%) |                   | 170 (28.24%) | 170 (28.24%) |                   |         |              |         |
| <70                   | 200 (27.66%)    | 199 (14.29%)   |         | 184 (30.51%)      | 199 (14.29%)   |         | 200 (27.66%) | 189 (26.14%) |                   | 184 (30.56%) | 178 (29.57%) |                   |         |              |         |
| Medication history    |                 |                |         |                   |                |         |              |              |                   |              |              |                   |         |              |         |
| Antihypertensive      | 634 (87.69%)    | 1,174 (84.28%) | 0.0348  | 510 (84.58%)      | 1,174 (84.28%) | 0.8661  | 634 (87.69%) | 628 (86.86%) | 0.6359            | 509 (84.55%) | 510 (84.72%) | 0.9363            |         |              |         |
| Antidiabetic          | 198 (27.39%)    | 374 (26.85%)   | 0.7918  | 143 (23.71%)      | 374 (26.85%)   | 0.1423  | 198 (27.39%) | 192 (26.56%) | 0.7222            | 143 (23.75%) | 145 (24.09%) | 0.8925            |         |              |         |
| Lipid-lowering agents | 140 (19.36%)    | 236 (16.94%)   | 0.1669  | 117 (19.4%)       | 236 (16.94%)   | 0.1858  | 140 (19.36%) | 132 (18.26%) | 0.5903            | 116 (19.27%) | 115 (19.1%)  | 0.9417            |         |              |         |
| Anticoagulant         | 304 (42.05%)    | 161 (11.56%)   | <0.0001 | 137 (22.72%)      | 161 (11.56%)   | <0.0001 | 304 (42.05%) | 318 (43.98%) | 0.4571            | 136 (22.59%) | 125 (20.76%) | 0.4417            |         |              |         |
| Antiplatelet          | 307 (42.46%)    | 790 (56.71%)   | <0.0001 | 289 (47.93%)      | 790 (56.71%)   | 0.0003  | 307 (42.46%) | 306 (42.32%) | 0.9576            | 289 (48.01%) | 288 (47.84%) | 0.954             |         |              |         |
| NSAIDs                | 723 (100%)      | 1,388 (99.64%) | 1       | 602 (99.83%)      | 1,388 (99.64%) | 0.4693  | 723 (100%)   | 723 (100%)   | 0.3177            | 601 (99.83%) | 601 (99.83%) | 1                 |         |              |         |
| Medical history       |                 |                |         |                   |                |         |              |              |                   |              |              |                   |         |              |         |
| Liver disease         | 94 (13%)        | 189 (13.57%)   | 0.7166  | 76 (12.6%)        | 189 (13.57%)   | 0.5599  | 94 (13%)     | 107 (14.8%)  | 0.3231            | 76 (12.62%)  | 75 (12.46%)  | 0.9307            |         |              |         |
| Peptic ulcer disease  | 197 (27.25%)    | 471 (33.81%)   | 0.0021  | 171 (28.36%)      | 471 (33.81%)   | 0.0166  | 197 (27.25%) | 174 (24.07%) | 0.1661            | 170 (28.24%) | 140 (23.26%) | 0.048             |         |              |         |
| Hypertension          | 552 (76.35%)    | 1,142 (81.98%) | 0.0021  | 454 (75.29%)      | 1,142 (81.98%) | 0.0006  | 552 (76.35%) | 553 (76.49%) | 0.9506            | 453 (75.25%) | 468 (77.74%) | 0.308             |         |              |         |
| Dyslipidemia          | 239 (33.06%)    | 389 (27.93%)   | 0.0143  | 204 (33.83%)      | 389 (27.93%)   | 0.008   | 239 (33.06%) | 230 (31.81%) | 0.6131            | 204 (33.89%) | 194 (32.23%) | 0.5401            |         |              |         |
| IHD                   | 299 (41.36%)    | 635 (45.59%)   | 0.0631  | 276 (45.77%)      | 635 (45.59%)   | 0.9389  | 299 (41.36%) | 303 (41.91%) | 0.831             | 275 (45.68%) | 273 (45.35%) | 0.9079            |         |              |         |
| ICH                   | 12 (1.66%)      | 53 (3.8%)      | 0.0067  | 14 (2.32%)        | 53 (3.8%)      | 0.0912  | 12 (1.66%)   | 13 (1.8%)    | 0.8401            | 14 (2.33%)   | 9 (1.5%)     | 0.2925            |         |              |         |
| TIA                   | 37 (5.12%)      | 78 (5.6%)      | 0.6429  | 31 (5.14%)        | 78 (5.6%)      | 0.6789  | 37 (5.12%)   | 31 (4.29%)   | 0.4561            | 31 (5.15%)   | 32 (5.32%)   | 0.897             |         |              |         |
| Alcohol intoxication  | 4 (0.55%)       | 14 (1.01%)     | 0.2832  | 8 (1.33%)         | 14 (1.01%)     | 0.5274  | 4 (0.55%)    | 4 (0.55%)    | 1                 | 8 (1.33%)    | 9 (1.5%)     | 0.807             |         |              |         |
| GI bleeding           | 85 (11.76%)     | 222 (15.94%)   | 0.0096  | 69 (11.44%)       | 222 (15.94%)   | 0.009   | 85 (11.76%)  | 66 (9.13%)   | 0.1023            | 69 (11.46%)  | 52 (8.64%)   | 0.1032            |         |              |         |
| Hematuria             | 39 (5.39%)      | 78 (5.6%)      | 0.8447  | 32 (5.31%)        | 78 (5.6%)      | 0.7925  | 39 (5.39%)   | 41 (5.67%)   | 0.818             | 32 (5.32%)   | 32 (5.32%)   | 1                 |         |              |         |
| VTE                   | 22 (3.04%)      | 29 (2.08%)     | 0.1716  | 9 (1.49%)         | 29 (2.08%)     | 0.3764  | 22 (3.04%)   | 22 (3.04%)   | 1                 | 9 (1.5%)     | 7 (1.16%)    | 0.6147            |         |              |         |
| Systemic embolism     | 10 (1.38%)      | 48 (3.45%)     | 0.0058  | 13 (2.16%)        | 48 (3.45%)     | 0.1242  | 10 (1.38%)   | 9 (1.24%)    | 0.8174            | 12 (1.99%)   | 7 (1.16%)    | 0.2476            |         |              |         |
| CHF                   | 359 (49.65%)    | 686 (49.25%)   | 0.8587  | 258 (42.79%)      | 686 (49.25%)   | 0.0079  | 359 (49.65%) | 380 (52.56%) | 0.2693            | 257 (42.69%) | 251 (41.69%) | 0.7262            |         |              |         |
| Myocardial infarction | 32 (4.43%)      | 119 (8.54%)    | 0.0005  | 41 (6.8%)         | 119 (8.54%)    | 0.1878  | 32 (4.43%)   | 26 (3.6%)    | 0.4213            | 41 (6.81%)   | 45 (7.48%)   | 0.6544            |         |              |         |
| PVD                   | 57 (7.88%)      | 132 (9.48%)    | 0.2233  | 38 (6.3%)         | 132 (9.48%)    | 0.0197  | 57 (7.88%)   | 51 (7.05%)   | 0.5484            | 37 (6.15%)   | 31 (5.15%)   | 0.4538            |         |              |         |
| CVA                   | 396 (54.77%)    | 724 (51.97%)   | 0.2214  | 323 (53.57%)      | 724 (51.97%)   | 0.5133  | 396 (54.77%) | 376 (52.01%) | 0.2917            | 322 (53.49%) | 316 (52.49%) | 0.729             |         |              |         |
| Diabetes mellitus     | 249 (34.44%)    | 509 (36.54%)   | 0.3393  | 196 (32.5%)       | 509 (36.54%)   | 0.0833  | 249 (34.44%) | 234 (32.37%) | 0.403             | 196 (32.56%) | 201 (33.39%) | 0.7592            |         |              |         |
| CKD                   | 199 (27.52%)    | 458 (32.88%)   | 0.0116  | 168 (27.86%)      | 458 (32.88%)   | 0.0265  | 199 (27.52%) | 184 (25.45%) | 0.3714            | 168 (27.91%) | 164 (27.24%) | 0.7964            |         |              |         |

(Continued)



**Supplementary Table S9** Baseline characteristics of severe stroke patients in terms of the effectiveness outcome before and after 30 day-by-day matching

|                       | Unmatched       |                |         |                   | Matched         |              |              |                   | p-Value | No treatment | p-Value      | No treatment | p-Value |
|-----------------------|-----------------|----------------|---------|-------------------|-----------------|--------------|--------------|-------------------|---------|--------------|--------------|--------------|---------|
|                       | Early treatment | No treatment   | p-Value | Delayed treatment | Early treatment | No treatment | p-Value      | Delayed treatment |         |              |              |              |         |
| Total                 | 899 (100%)      | 2,690 (100%)   |         | 607 (100%)        | 2,690 (100%)    |              | 899 (100%)   | 607 (100%)        |         | 899 (100%)   | 607 (100%)   |              | 0-7288  |
| Gender                |                 |                | 0-9215  |                   |                 | 0-478        |              |                   | 0-3885  |              |              |              |         |
| Female                | 519 (57.73%)    | 1,558 (57.92%) |         | 342 (56.34%)      | 1,558 (57.92%)  |              | 519 (57.73%) | 342 (56.34%)      |         | 519 (57.73%) | 342 (56.34%) |              |         |
| Male                  | 380 (42.27%)    | 1,132 (42.08%) |         | 265 (43.66%)      | 1,132 (42.08%)  |              | 380 (42.27%) | 265 (43.66%)      |         | 380 (42.27%) | 265 (43.66%) |              |         |
| Age                   |                 |                | <0-0001 |                   |                 | <0-0001      |              |                   | 0-7902  |              |              |              | 0-4881  |
| ≥80                   | 365 (40.6%)     | 1,408 (52.34%) |         | 247 (40.69%)      | 1,408 (52.34%)  |              | 365 (40.6%)  | 247 (40.69%)      |         | 365 (40.6%)  | 247 (40.69%) |              |         |
| 70-80                 | 303 (33.7%)     | 826 (30.71%)   |         | 203 (33.44%)      | 826 (30.71%)    |              | 303 (33.7%)  | 203 (33.44%)      |         | 303 (33.7%)  | 203 (33.44%) |              |         |
| <70                   | 231 (25.7%)     | 456 (16.95%)   |         | 157 (25.86%)      | 456 (16.95%)    |              | 231 (25.7%)  | 157 (25.86%)      |         | 231 (25.7%)  | 157 (25.86%) |              |         |
| Medication history    |                 |                |         |                   |                 |              |              |                   |         |              |              |              |         |
| Antihypertensive      | 795 (88.43%)    | 2,332 (86.69%) | 0-1774  | 513 (84.51%)      | 2,332 (86.69%)  | 0-1589       | 795 (88.43%) | 513 (84.51%)      | 0-7661  | 795 (88.88%) | 513 (84.51%) | 0-7661       | 0-9366  |
| Antidiabetic          | 252 (28.03%)    | 745 (27.7%)    | 0-8456  | 135 (22.24%)      | 745 (27.7%)     | 0-0061       | 252 (28.03%) | 135 (22.24%)      | 0-7519  | 246 (27.36%) | 135 (22.24%) | 0-7519       | 0-0528  |
| Lipid-lowering agents | 183 (20.36%)    | 497 (18.48%)   | 0-213   | 136 (22.41%)      | 497 (18.48%)    | 0-0264       | 183 (20.36%) | 136 (22.41%)      | 0-554   | 173 (19.24%) | 136 (22.41%) | 0-554        | 0-5778  |
| Anticoagulant         | 357 (39.71%)    | 382 (14.2%)    | <0-0001 | 128 (21.09%)      | 382 (14.2%)     | <0-0001      | 357 (39.71%) | 128 (21.09%)      | 0-4388  | 341 (37.93%) | 128 (21.09%) | 0-4388       | 0-569   |
| Antiplatelet          | 401 (44.61%)    | 1,476 (54.87%) | <0-0001 | 254 (41.85%)      | 1,476 (54.87%)  | <0-0001      | 401 (44.61%) | 254 (41.85%)      | 0-704   | 393 (43.72%) | 254 (41.85%) | 0-704        | 0-4477  |
| NSAIDs                | 897 (99.78%)    | 2,678 (99.55%) | 0-3517  | 606 (99.84%)      | 2,678 (99.55%)  | 0-3177       | 897 (99.78%) | 606 (99.84%)      | 1       | 897 (99.78%) | 606 (99.84%) | 1            | 1       |
| Medical history       |                 |                |         |                   |                 |              |              |                   |         |              |              |              |         |
| Liver disease         | 114 (12.68%)    | 297 (11.04%)   | 0-1813  | 66 (10.87%)       | 297 (11.04%)    | 0-9051       | 114 (12.68%) | 66 (10.87%)       | 0-242   | 98 (10.9%)   | 66 (10.87%)  | 0-242        | 0-6502  |
| Peptic ulcer disease  | 258 (28.7%)     | 824 (30.63%)   | 0-2741  | 146 (24.05%)      | 824 (30.63%)    | 0-0013       | 258 (28.7%)  | 146 (24.05%)      | 0-4946  | 245 (27.25%) | 146 (24.05%) | 0-4946       | 0-3752  |
| Hypertension          | 689 (76.64%)    | 2,188 (81.34%) | 0-0022  | 465 (76.61%)      | 2,188 (81.34%)  | 0-0079       | 689 (76.64%) | 465 (76.61%)      | 0-4734  | 676 (75.19%) | 465 (76.61%) | 0-4734       | 0-4225  |
| Dyslipidemia          | 284 (31.59%)    | 791 (29.41%)   | 0-2155  | 206 (33.94%)      | 791 (29.41%)    | 0-0281       | 284 (31.59%) | 206 (33.94%)      | 0-7993  | 279 (31.03%) | 206 (33.94%) | 0-7993       | 0-67    |
| IHD                   | 371 (41.27%)    | 1,227 (45.61%) | 0-0232  | 237 (39.04%)      | 1,227 (45.61%)  | 0-0033       | 371 (41.27%) | 237 (39.04%)      | 0-9236  | 369 (41.05%) | 237 (39.04%) | 0-9236       | 0-5548  |
| ICH                   | 21 (2.34%)      | 67 (2.49%)     | 0-795   | 13 (2.14%)        | 67 (2.49%)      | 0-6137       | 21 (2.34%)   | 13 (2.14%)        | 0-3106  | 28 (3.11%)   | 13 (2.14%)   | 0-3106       | 0-7022  |
| TIA                   | 46 (5.12%)      | 125 (4.65%)    | 0-5669  | 20 (3.29%)        | 125 (4.65%)     | 0-1423       | 46 (5.12%)   | 20 (3.29%)        | 0-8288  | 44 (4.89%)   | 20 (3.29%)   | 0-8288       | 0-2966  |
| Alcohol intoxication  | 8 (0.89%)       | 22 (0.82%)     | 0-8373  | 6 (0.99%)         | 22 (0.82%)      | 0-679        | 8 (0.89%)    | 6 (0.99%)         | 0-2466  | 4 (0.44%)    | 6 (0.99%)    | 0-2466       | 0-5908  |
| GI bleeding           | 85 (9.45%)      | 343 (12.75%)   | 0-0083  | 58 (9.56%)        | 343 (12.75%)    | 0-0296       | 85 (9.45%)   | 58 (9.56%)        | 0-127   | 67 (7.45%)   | 58 (9.56%)   | 0-127        | 0-6916  |
| Hematuria             | 34 (3.78%)      | 94 (3.49%)     | 0-6873  | 25 (4.12%)        | 94 (3.49%)      | 0-4564       | 34 (3.78%)   | 25 (4.12%)        | 0-182   | 24 (2.67%)   | 25 (4.12%)   | 0-182        | 1       |
| VTE                   | 26 (2.89%)      | 56 (2.08%)     | 0-1592  | 12 (1.98%)        | 56 (2.08%)      | 0-8696       | 26 (2.89%)   | 12 (1.98%)        | 0-2221  | 18 (2%)      | 12 (1.98%)   | 0-2221       | 0-509   |
| Systemic embolism     | 26 (2.89%)      | 94 (3.49%)     | 0-3845  | 14 (2.31%)        | 94 (3.49%)      | 0-1375       | 26 (2.89%)   | 14 (2.31%)        | 0-7742  | 24 (2.67%)   | 14 (2.31%)   | 0-7742       | 0-1967  |
| CHF                   | 464 (51.61%)    | 1,313 (48.81%) | 0-1457  | 264 (43.49%)      | 1,313 (48.81%)  | 0-0178       | 464 (51.61%) | 264 (43.49%)      | 0-4504  | 448 (49.83%) | 264 (43.49%) | 0-4504       | 0-486   |
| Myocardial infarction | 65 (7.23%)      | 212 (7.88%)    | 0-5267  | 31 (5.11%)        | 212 (7.88%)     | 0-0181       | 65 (7.23%)   | 31 (5.11%)        | 0-5338  | 72 (8.01%)   | 31 (5.11%)   | 0-5338       | 0-1564  |
| PVD                   | 76 (8.45%)      | 279 (10.37%)   | 0-0954  | 40 (6.59%)        | 279 (10.37%)    | 0-0044       | 76 (8.45%)   | 40 (6.59%)        | 0-3819  | 66 (7.34%)   | 40 (6.59%)   | 0-3819       | 0-9074  |
| CVA                   | 526 (58.51%)    | 1,581 (58.77%) | 0-8894  | 406 (66.89%)      | 1,581 (58.77%)  | 0-0002       | 526 (58.51%) | 406 (66.89%)      | 0-6672  | 517 (57.51%) | 406 (66.89%) | 0-6672       | 0-3646  |
| Diabetes mellitus     | 307 (34.15%)    | 973 (36.17%)   | 0-2732  | 185 (30.48%)      | 973 (36.17%)    | 0-008        | 307 (34.15%) | 185 (30.48%)      | 0-9207  | 305 (33.93%) | 185 (30.48%) | 0-9207       | 0-144   |

(Continued)

**Supplementary Table S9 (Continued)**

|                                  | Unmatched                                                                                                                 |              |         |        | Matched         |              |         |              |
|----------------------------------|---------------------------------------------------------------------------------------------------------------------------|--------------|---------|--------|-----------------|--------------|---------|--------------|
|                                  | Early treatment                                                                                                           | No treatment | p-Value |        | Early treatment | No treatment | p-Value |              |
| CKD                              | 234 (26.03%)                                                                                                              | 804 (29.89%) | 0.0271  | 0.0018 | 234 (26.03%)    | 234 (26.03%) | 1       | 0.8386       |
| Secondary prevention             |                                                                                                                           |              |         |        |                 |              |         |              |
| Anticoagulant                    |                                                                                                                           |              |         |        |                 |              |         |              |
| NOAC                             | 176 (19.58%)                                                                                                              | 0            |         |        | 176 (19.58%)    | 0            |         |              |
| Warfarin                         | 622 (69.19%)                                                                                                              | 0            |         |        | 622 (69.19%)    | 0            |         |              |
| Both                             | 101 (11.23%)                                                                                                              | 0            |         |        | 101 (11.23%)    | 0            |         |              |
| Antiplatelet (AIS to index date) | Reference to Supplementary Table 7, severe stroke, 0–12th day for early treatment and 13th–29th day for delayed treatment |              |         |        |                 |              |         |              |
|                                  |                                                                                                                           |              |         |        | 668 (74.3%)     | 662 (73.64%) | 0.7471  | 0.5024       |
|                                  |                                                                                                                           |              |         |        |                 |              |         | 550 (90.61%) |
|                                  |                                                                                                                           |              |         |        |                 |              |         | 140 (23.06%) |
|                                  |                                                                                                                           |              |         |        |                 |              |         | 143 (23.56%) |
|                                  |                                                                                                                           |              |         |        |                 |              |         | 338 (55.68%) |
|                                  |                                                                                                                           |              |         |        |                 |              |         | 254 (41.85%) |
|                                  |                                                                                                                           |              |         |        |                 |              |         | 15 (2.47%)   |

Abbreviations: AIS, acute ischemic stroke; CHF, congestive heart failure; CKD, chronic kidney disease; CVA, cerebrovascular accident; GI, gastrointestinal; ICH, intracranial hemorrhage; IHD, ischemic heart disease; NOAC, non-vitamin K antagonist oral anticoagulant; NSAIDs, nonsteroidal anti-inflammatory drugs; PVD, peripheral vascular disease; TIA, transient ischemic attack; VTE, venous thromboembolism. Note: Data are mean ± standard deviation (SD) or n (%).

**Supplementary Table S10** Baseline characteristics of mild stroke patients in terms of safety outcomes before and after 30 day-by-day matching

|                       | Unmatched       |                        |         |                        | Matched         |                        |                |                        | p-Value        | No treatment<br>(100%) | Delayed treatment | p-Value        | No treatment<br>(100%) | Delayed treatment | p-Value        | No treatment<br>(100%) | p-Value |
|-----------------------|-----------------|------------------------|---------|------------------------|-----------------|------------------------|----------------|------------------------|----------------|------------------------|-------------------|----------------|------------------------|-------------------|----------------|------------------------|---------|
|                       | Early treatment | No treatment<br>(100%) | p-Value | No treatment<br>(100%) | Early treatment | No treatment<br>(100%) | p-Value        | No treatment<br>(100%) |                |                        |                   |                |                        |                   |                |                        |         |
| Total                 | 1,383 (100%)    | 1,984 (100%)           |         | 1,984 (100%)           | 1,383 (100%)    |                        | 1,383 (100%)   | 1,383 (100%)           | 1,358 (100%)   |                        | 1,358 (100%)      | 1,383 (100%)   | 1,358 (100%)           |                   | 1,358 (100%)   |                        | 0.969   |
| Gender                |                 |                        | 0.3513  |                        |                 | 0.3374                 |                |                        |                | 0.8485                 |                   |                |                        |                   |                |                        |         |
| Female                | 624 (45.12%)    | 863 (43.5%)            |         | 863 (43.5%)            | 624 (45.12%)    |                        | 624 (45.12%)   | 624 (45.12%)           | 568 (41.83%)   |                        | 568 (41.83%)      | 624 (45.12%)   | 568 (41.83%)           |                   | 569 (41.9%)    |                        |         |
| Male                  | 759 (54.88%)    | 1,121 (56.5%)          |         | 1,121 (56.5%)          | 759 (54.88%)    |                        | 754 (54.52%)   | 759 (54.88%)           | 790 (58.17%)   |                        | 790 (58.17%)      | 754 (54.52%)   | 790 (58.17%)           |                   | 789 (58.1%)    |                        |         |
| Age                   |                 |                        | <0.0001 |                        |                 | <0.0001                |                |                        |                | 0.4701                 |                   |                |                        |                   |                |                        | 0.7179  |
| ≥80                   | 460 (33.26%)    | 918 (46.27%)           |         | 918 (46.27%)           | 460 (33.26%)    |                        | 430 (31.09%)   | 460 (33.26%)           | 454 (33.43%)   |                        | 454 (33.43%)      | 430 (31.09%)   | 454 (33.43%)           |                   | 458 (33.73%)   |                        |         |
| 70-80                 | 492 (35.57%)    | 637 (32.11%)           |         | 637 (32.11%)           | 492 (35.57%)    |                        | 511 (36.95%)   | 492 (35.57%)           | 476 (35.05%)   |                        | 476 (35.05%)      | 511 (36.95%)   | 476 (35.05%)           |                   | 457 (33.65%)   |                        |         |
| <70                   | 431 (31.16%)    | 429 (21.62%)           |         | 429 (21.62%)           | 431 (31.16%)    |                        | 442 (31.96%)   | 431 (31.16%)           | 428 (31.52%)   |                        | 428 (31.52%)      | 442 (31.96%)   | 428 (31.52%)           |                   | 443 (32.62%)   |                        |         |
| Medication history    |                 |                        |         |                        |                 |                        |                |                        |                |                        |                   |                |                        |                   |                |                        |         |
| Antihypertensive      | 1,224 (88.5%)   | 1,732 (87.3%)          | 0.2934  | 1,732 (87.3%)          | 1,224 (88.5%)   |                        | 1,238 (89.52%) | 1,224 (88.5%)          | 1,148 (84.54%) |                        | 1,148 (84.54%)    | 1,238 (89.52%) | 1,148 (84.54%)         |                   | 1,118 (82.33%) |                        | 0.1216  |
| Antidiabetic          | 381 (27.55%)    | 605 (30.49%)           | 0.0647  | 605 (30.49%)           | 381 (27.55%)    |                        | 374 (27.04%)   | 381 (27.55%)           | 344 (25.33%)   |                        | 344 (25.33%)      | 374 (27.04%)   | 344 (25.33%)           |                   | 353 (25.99%)   |                        | 0.6926  |
| Lipid-lowering agents | 326 (23.57%)    | 426 (21.47%)           | 0.15    | 426 (21.47%)           | 326 (23.57%)    |                        | 344 (24.87%)   | 326 (23.57%)           | 318 (23.42%)   |                        | 318 (23.42%)      | 344 (24.87%)   | 318 (23.42%)           |                   | 312 (22.97%)   |                        | 0.785   |
| Anticoagulant         | 661 (47.79%)    | 210 (10.58%)           | <0.0001 | 210 (10.58%)           | 661 (47.79%)    |                        | 643 (46.49%)   | 661 (47.79%)           | 320 (23.56%)   |                        | 320 (23.56%)      | 643 (46.49%)   | 320 (23.56%)           |                   | 277 (20.4%)    |                        | 0.0463  |
| Antiplatelet          | 641 (46.35%)    | 1,198 (60.38%)         | <0.0001 | 1,198 (60.38%)         | 641 (46.35%)    |                        | 681 (49.24%)   | 641 (46.35%)           | 722 (53.17%)   |                        | 722 (53.17%)      | 681 (49.24%)   | 722 (53.17%)           |                   | 722 (53.17%)   |                        | 1       |
| NSAIDs                | 1,383 (100%)    | 1,981 (99.85%)         | 1       | 1,981 (99.85%)         | 1,383 (100%)    |                        | 1,383 (100%)   | 1,383 (100%)           | 1,358 (100%)   |                        | 1,358 (100%)      | 1,383 (100%)   | 1,358 (100%)           |                   | 1,358 (100%)   |                        | 0.5388  |
| Medical history       |                 |                        |         |                        |                 |                        |                |                        |                |                        |                   |                |                        |                   |                |                        |         |
| Liver disease         | 189 (13.67%)    | 302 (15.22%)           | 0.2082  | 302 (15.22%)           | 189 (13.67%)    |                        | 192 (13.88%)   | 189 (13.67%)           | 221 (16.27%)   |                        | 221 (16.27%)      | 192 (13.88%)   | 221 (16.27%)           |                   | 208 (15.32%)   |                        | 0.494   |
| Peptic ulcer disease  | 374 (27.04%)    | 695 (35.03%)           | <0.0001 | 695 (35.03%)           | 374 (27.04%)    |                        | 359 (25.96%)   | 374 (27.04%)           | 386 (28.42%)   |                        | 386 (28.42%)      | 359 (25.96%)   | 386 (28.42%)           |                   | 391 (28.79%)   |                        | 0.8319  |
| Hypertension          | 1,084 (78.38%)  | 1,666 (83.97%)         | <0.0001 | 1,666 (83.97%)         | 1,084 (78.38%)  |                        | 1,103 (79.75%) | 1,084 (78.38%)         | 1,065 (78.42%) |                        | 1,065 (78.42%)    | 1,103 (79.75%) | 1,065 (78.42%)         |                   | 1,082 (79.68%) |                        | 0.4228  |
| Dyslipidemia          | 484 (35%)       | 688 (34.68%)           | 0.8484  | 688 (34.68%)           | 484 (35%)       |                        | 478 (34.56%)   | 484 (35%)              | 491 (36.16%)   |                        | 491 (36.16%)      | 478 (34.56%)   | 491 (36.16%)           |                   | 487 (35.86%)   |                        | 0.873   |
| IHD                   | 662 (47.87%)    | 1,005 (50.66%)         | 0.1114  | 1,005 (50.66%)         | 662 (47.87%)    |                        | 670 (48.45%)   | 662 (47.87%)           | 643 (47.35%)   |                        | 643 (47.35%)      | 670 (48.45%)   | 643 (47.35%)           |                   | 658 (48.45%)   |                        | 0.5645  |
| ICH                   | 28 (2.02%)      | 64 (3.23%)             | 0.0354  | 64 (3.23%)             | 28 (2.02%)      |                        | 34 (2.46%)     | 28 (2.02%)             | 21 (1.55%)     |                        | 21 (1.55%)        | 34 (2.46%)     | 21 (1.55%)             |                   | 17 (1.25%)     |                        | 0.5135  |
| TIA                   | 101 (7.3%)      | 145 (7.31%)            | 0.9952  | 145 (7.31%)            | 101 (7.3%)      |                        | 86 (6.22%)     | 101 (7.3%)             | 97 (7.14%)     |                        | 97 (7.14%)        | 86 (6.22%)     | 97 (7.14%)             |                   | 89 (6.55%)     |                        | 0.5433  |
| Alcohol intoxication  | 13 (0.94%)      | 24 (1.21%)             | 0.4602  | 24 (1.21%)             | 13 (0.94%)      |                        | 13 (0.94%)     | 13 (0.94%)             | 12 (0.88%)     |                        | 12 (0.88%)        | 13 (0.94%)     | 12 (0.88%)             |                   | 15 (1.1%)      |                        | 0.5618  |
| GI bleeding           | 129 (9.33%)     | 275 (13.86%)           | <0.0001 | 275 (13.86%)           | 129 (9.33%)     |                        | 122 (8.82%)    | 129 (9.33%)            | 127 (9.35%)    |                        | 127 (9.35%)       | 122 (8.82%)    | 127 (9.35%)            |                   | 129 (9.5%)     |                        | 0.8955  |
| Hematuria             | 70 (5.06%)      | 92 (4.64%)             | 0.5713  | 92 (4.64%)             | 70 (5.06%)      |                        | 71 (5.13%)     | 70 (5.06%)             | 67 (4.93%)     |                        | 67 (4.93%)        | 71 (5.13%)     | 67 (4.93%)             |                   | 59 (4.34%)     |                        | 0.4655  |
| VTE                   | 30 (2.17%)      | 30 (1.51%)             | 0.1562  | 30 (1.51%)             | 30 (2.17%)      |                        | 25 (1.81%)     | 30 (2.17%)             | 25 (1.84%)     |                        | 25 (1.84%)        | 25 (1.81%)     | 25 (1.84%)             |                   | 19 (1.4%)      |                        | 0.3618  |
| Systemic embolism     | 35 (2.53%)      | 70 (3.53%)             | 0.1014  | 70 (3.53%)             | 35 (2.53%)      |                        | 35 (2.53%)     | 35 (2.53%)             | 48 (3.53%)     |                        | 48 (3.53%)        | 35 (2.53%)     | 48 (3.53%)             |                   | 38 (2.8%)      |                        | 0.2732  |
| CHF                   | 640 (46.28%)    | 884 (44.56%)           | 0.324   | 884 (44.56%)           | 640 (46.28%)    |                        | 612 (44.25%)   | 640 (46.28%)           | 531 (39.1%)    |                        | 531 (39.1%)       | 612 (44.25%)   | 531 (39.1%)            |                   | 512 (37.7%)    |                        | 0.4535  |
| Myocardial infarction | 109 (7.88%)     | 201 (10.13%)           | 0.0263  | 201 (10.13%)           | 109 (7.88%)     |                        | 103 (7.45%)    | 109 (7.88%)            | 96 (7.07%)     |                        | 96 (7.07%)        | 103 (7.45%)    | 96 (7.07%)             |                   | 97 (7.14%)     |                        | 0.9405  |
| PVD                   | 120 (8.68%)     | 208 (10.48%)           | 0.0819  | 208 (10.48%)           | 120 (8.68%)     |                        | 123 (8.89%)    | 120 (8.68%)            | 110 (8.1%)     |                        | 110 (8.1%)        | 123 (8.89%)    | 110 (8.1%)             |                   | 98 (7.22%)     |                        | 0.3866  |
| CVA                   | 643 (46.49%)    | 926 (46.67%)           | 0.9178  | 926 (46.67%)           | 643 (46.49%)    |                        | 614 (44.4%)    | 643 (46.49%)           | 650 (47.86%)   |                        | 650 (47.86%)      | 614 (44.4%)    | 650 (47.86%)           |                   | 625 (46.02%)   |                        | 0.3364  |
| Diabetes mellitus     | 478 (34.56%)    | 790 (39.82%)           | 0.002   | 790 (39.82%)           | 478 (34.56%)    |                        | 455 (32.9%)    | 478 (34.56%)           | 454 (33.43%)   |                        | 454 (33.43%)      | 455 (32.9%)    | 454 (33.43%)           |                   | 432 (31.81%)   |                        | 0.3679  |

(Continued)

**Supplementary Table S10 (Continued)**

|                                  | Unmatched                                                                                                              |              |         |              | Matched         |              |         |               |                |        |
|----------------------------------|------------------------------------------------------------------------------------------------------------------------|--------------|---------|--------------|-----------------|--------------|---------|---------------|----------------|--------|
|                                  | Early treatment                                                                                                        | No treatment | p-Value |              | Early treatment | No treatment | p-Value |               |                |        |
| CKD                              | 377 (27.26%)                                                                                                           | 680 (34.27%) | <0.0001 | 340 (25.04%) | 377 (27.26%)    | 383 (27.69%) | 0.7983  | 340 (25.04%)  | 321 (23.64%)   | 0.3956 |
| <b>Secondary prevention</b>      |                                                                                                                        |              |         |              |                 |              |         |               |                |        |
| Anticoagulant                    |                                                                                                                        |              |         |              |                 |              |         |               |                |        |
| NOAC                             | 373 (26.97%)                                                                                                           | 0            |         | 762 (56.11%) | 373 (26.97%)    | 0            |         | 762 (56.11%)  | 0              |        |
| Warfarin                         | 845 (61.1%)                                                                                                            | 0            |         | 530 (39.03%) | 845 (61.1%)     | 0            |         | 530 (39.03%)  | 0              |        |
| Both                             | 165 (11.93%)                                                                                                           | 0            |         | 66 (4.86%)   | 165 (11.93%)    | 0            |         | 66 (4.86%)    | 0              |        |
| Antiplatelet (AIS to index date) | Reference to Supplementary Table 11, mild stroke, 0–3rd day for early treatment and 4th–29th day for delayed treatment |              |         |              |                 |              |         |               |                |        |
|                                  |                                                                                                                        |              |         |              | 884 (63.92%)    | 868 (62.76%) | 0.5278  | 1,153 (84.9%) | 1,163 (85.64%) | 0.5882 |

Abbreviations: AIS, acute ischemic stroke; CHF, congestive heart failure; CKD, chronic kidney disease; CVA, cerebrovascular accident; GI, gastrointestinal; ICH, intracranial hemorrhage; IHD, ischemic heart disease; NOAC, non-vitamin K antagonist oral anticoagulant; NSAIDs, nonsteroidal anti-inflammatory drugs; PVD, peripheral vascular disease; TIA, transient ischemic attack; VTE, venous thromboembolism. Note: Data are mean ± standard deviation (SD) or n (%).



**Supplementary Table S11** Use of antiplatelet treatment for stroke of varying severity in terms of the safety outcome before day-by-day matching

| Day | Mild                  |                     |       |                          |                     |              | Moderate            |                     |     |                        |                     |                | Severe                |                     |  |                          |                     |  |                     |                     |  |                        |                     |  |
|-----|-----------------------|---------------------|-------|--------------------------|---------------------|--------------|---------------------|---------------------|-----|------------------------|---------------------|----------------|-----------------------|---------------------|--|--------------------------|---------------------|--|---------------------|---------------------|--|------------------------|---------------------|--|
|     | Use of anticoagulants |                     |       | No use of anticoagulants |                     |              | Use of antiplatelet |                     |     | No use of antiplatelet |                     |                | Use of anticoagulants |                     |  | No use of anticoagulants |                     |  | Use of antiplatelet |                     |  | No use of antiplatelet |                     |  |
|     | N                     | Use of antiplatelet |       | N                        | Use of antiplatelet |              | N                   | Use of antiplatelet |     | N                      | Use of antiplatelet |                | N                     | Use of antiplatelet |  | N                        | Use of antiplatelet |  | N                   | Use of antiplatelet |  | N                      | Use of antiplatelet |  |
| 0   | 577                   | 296 (51.3%)         | 4,148 | 3,396 (81.87%)           | 208                 | 119 (57.21%) | 2,547               | 2,102 (82.53%)      | 205 | 130 (63.41%)           | 4,024               | 3,446 (85.64%) |                       |                     |  |                          |                     |  |                     |                     |  |                        |                     |  |
| 1   | 420                   | 275 (65.48%)        | 3,723 | 3,119 (83.78%)           | 189                 | 115 (60.85%) | 2,335               | 1,975 (84.58%)      | 166 | 120 (72.29%)           | 3,817               | 3,302 (86.51%) |                       |                     |  |                          |                     |  |                     |                     |  |                        |                     |  |
| 2   | 211                   | 168 (79.62%)        | 3,508 | 2,954 (84.21%)           | 107                 | 81 (75.7%)   | 2,212               | 1,880 (84.99%)      | 93  | 63 (67.74%)            | 3,660               | 3,195 (87.3%)  |                       |                     |  |                          |                     |  |                     |                     |  |                        |                     |  |
| 3   | 175                   | 144 (82.29%)        | 3,330 | 2,810 (84.38%)           | 82                  | 54 (65.85%)  | 2,111               | 1,814 (85.93%)      | 61  | 46 (75.41%)            | 3,510               | 3,081 (87.78%) |                       |                     |  |                          |                     |  |                     |                     |  |                        |                     |  |
| 4   | 142                   | 121 (85.21%)        | 3,187 | 2,690 (84.41%)           | 71                  | 59 (83.1%)   | 2,017               | 1,737 (86.12%)      | 66  | 45 (68.18%)            | 3,383               | 2,992 (88.44%) |                       |                     |  |                          |                     |  |                     |                     |  |                        |                     |  |
| 5   | 100                   | 77 (77%)            | 3,083 | 2,610 (84.66%)           | 46                  | 40 (86.96%)  | 1,962               | 1,691 (86.19%)      | 50  | 33 (66%)               | 3,267               | 2,904 (88.89%) |                       |                     |  |                          |                     |  |                     |                     |  |                        |                     |  |
| 6   | 97                    | 73 (75.26%)         | 2,984 | 2,539 (85.09%)           | 61                  | 47 (77.05%)  | 1,893               | 1,637 (86.48%)      | 50  | 43 (86%)               | 3,182               | 2,833 (89.03%) |                       |                     |  |                          |                     |  |                     |                     |  |                        |                     |  |
| 7   | 97                    | 79 (81.44%)         | 2,885 | 2,458 (85.2%)            | 58                  | 49 (84.48%)  | 1,823               | 1,578 (86.56%)      | 36  | 31 (86.11%)            | 3,116               | 2,777 (89.12%) |                       |                     |  |                          |                     |  |                     |                     |  |                        |                     |  |
| 8   | 66                    | 52 (78.79%)         | 2,818 | 2,408 (85.45%)           | 45                  | 43 (95.56%)  | 1,768               | 1,528 (86.43%)      | 50  | 44 (88%)               | 3,032               | 2,708 (89.31%) |                       |                     |  |                          |                     |  |                     |                     |  |                        |                     |  |
| 9   | 63                    | 57 (90.48%)         | 2,749 | 2,354 (85.63%)           | 37                  | 35 (94.59%)  | 1,719               | 1,486 (86.45%)      | 37  | 33 (89.19%)            | 2,963               | 2,650 (89.44%) |                       |                     |  |                          |                     |  |                     |                     |  |                        |                     |  |
| 10  | 70                    | 63 (90%)            | 2,674 | 2,292 (85.71%)           | 41                  | 38 (92.68%)  | 1,673               | 1,445 (86.37%)      | 52  | 48 (92.31%)            | 2,883               | 2,580 (89.49%) |                       |                     |  |                          |                     |  |                     |                     |  |                        |                     |  |
| 11  | 84                    | 70 (83.33%)         | 2,583 | 2,221 (85.99%)           | 40                  | 34 (85%)     | 1,627               | 1,409 (86.6%)       | 46  | 41 (89.13%)            | 2,811               | 2,518 (89.58%) |                       |                     |  |                          |                     |  |                     |                     |  |                        |                     |  |
| 12  | 69                    | 60 (86.96%)         | 2,501 | 2,154 (86.13%)           | 52                  | 47 (90.38%)  | 1,566               | 1,355 (86.53%)      | 40  | 34 (85%)               | 2,748               | 2,466 (89.74%) |                       |                     |  |                          |                     |  |                     |                     |  |                        |                     |  |
| 13  | 78                    | 69 (88.46%)         | 2,412 | 2,083 (86.36%)           | 51                  | 46 (90.2%)   | 1,507               | 1,305 (86.6%)       | 65  | 54 (83.08%)            | 2,671               | 2,401 (89.89%) |                       |                     |  |                          |                     |  |                     |                     |  |                        |                     |  |
| 14  | 107                   | 92 (85.98%)         | 2,298 | 1,990 (86.6%)            | 71                  | 65 (91.55%)  | 1,430               | 1,234 (86.29%)      | 105 | 96 (91.43%)            | 2,541               | 2,286 (89.96%) |                       |                     |  |                          |                     |  |                     |                     |  |                        |                     |  |
| 15  | 63                    | 61 (96.83%)         | 2,227 | 1,927 (86.53%)           | 41                  | 39 (95.12%)  | 1,379               | 1,186 (86%)         | 66  | 57 (86.36%)            | 2,450               | 2,205 (90%)    |                       |                     |  |                          |                     |  |                     |                     |  |                        |                     |  |
| 16  | 50                    | 43 (86%)            | 2,173 | 1,884 (86.7%)            | 42                  | 40 (95.24%)  | 1,329               | 1,140 (85.78%)      | 55  | 47 (85.45%)            | 2,380               | 2,149 (90.29%) |                       |                     |  |                          |                     |  |                     |                     |  |                        |                     |  |
| 17  | 37                    | 34 (91.89%)         | 2,128 | 1,845 (86.7%)            | 26                  | 21 (80.77%)  | 1,294               | 1,117 (86.32%)      | 53  | 45 (84.91%)            | 2,308               | 2,088 (90.47%) |                       |                     |  |                          |                     |  |                     |                     |  |                        |                     |  |
| 18  | 26                    | 22 (84.62%)         | 2,094 | 1,823 (87.06%)           | 28                  | 27 (96.43%)  | 1,258               | 1,087 (86.41%)      | 40  | 37 (92.5%)             | 2,245               | 2,028 (90.33%) |                       |                     |  |                          |                     |  |                     |                     |  |                        |                     |  |
| 19  | 27                    | 25 (92.59%)         | 2,062 | 1,794 (87%)              | 28                  | 24 (85.71%)  | 1,220               | 1,058 (86.72%)      | 45  | 40 (88.89%)            | 2,185               | 1,976 (90.43%) |                       |                     |  |                          |                     |  |                     |                     |  |                        |                     |  |
| 20  | 24                    | 20 (83.33%)         | 2,034 | 1,775 (87.27%)           | 16                  | 13 (81.25%)  | 1,193               | 1,035 (86.76%)      | 35  | 33 (94.29%)            | 2,139               | 1,934 (90.42%) |                       |                     |  |                          |                     |  |                     |                     |  |                        |                     |  |
| 21  | 31                    | 23 (74.19%)         | 1,996 | 1,748 (87.58%)           | 12                  | 7 (58.33%)   | 1,175               | 1,023 (87.06%)      | 23  | 17 (73.91%)            | 2,105               | 1,910 (90.74%) |                       |                     |  |                          |                     |  |                     |                     |  |                        |                     |  |
| 22  | 21                    | 20 (95.24%)         | 1,972 | 1,731 (87.78%)           | 10                  | 10 (100%)    | 1,160               | 1,009 (86.98%)      | 21  | 18 (85.71%)            | 2,074               | 1,886 (90.94%) |                       |                     |  |                          |                     |  |                     |                     |  |                        |                     |  |
| 23  | 21                    | 17 (80.95%)         | 1,947 | 1,714 (88.03%)           | 16                  | 14 (87.5%)   | 1,141               | 994 (87.12%)        | 25  | 25 (100%)              | 2,038               | 1,852 (90.87%) |                       |                     |  |                          |                     |  |                     |                     |  |                        |                     |  |
| 24  | 16                    | 14 (87.5%)          | 1,925 | 1,695 (88.05%)           | 5                   | 3 (60%)      | 1,124               | 984 (87.54%)        | 20  | 18 (90%)               | 2,003               | 1,820 (90.86%) |                       |                     |  |                          |                     |  |                     |                     |  |                        |                     |  |
| 25  | 13                    | 11 (84.62%)         | 1,911 | 1,683 (88.07%)           | 10                  | 8 (80%)      | 1,107               | 969 (87.53%)        | 22  | 21 (95.45%)            | 1,968               | 1,789 (90.9%)  |                       |                     |  |                          |                     |  |                     |                     |  |                        |                     |  |
| 26  | 19                    | 17 (89.47%)         | 1,888 | 1,667 (88.29%)           | 9                   | 8 (88.89%)   | 1,098               | 961 (87.52%)        | 14  | 13 (92.86%)            | 1,946               | 1,769 (90.9%)  |                       |                     |  |                          |                     |  |                     |                     |  |                        |                     |  |
| 27  | 15                    | 10 (66.67%)         | 1,869 | 1,656 (88.6%)            | 4                   | 3 (75%)      | 1,087               | 953 (87.67%)        | 14  | 12 (85.71%)            | 1,912               | 1,739 (90.95%) |                       |                     |  |                          |                     |  |                     |                     |  |                        |                     |  |
| 28  | 12                    | 12 (100%)           | 1,851 | 1,643 (88.76%)           | 10                  | 10 (100%)    | 1,074               | 943 (87.8%)         | 19  | 17 (89.47%)            | 1,882               | 1,717 (91.23%) |                       |                     |  |                          |                     |  |                     |                     |  |                        |                     |  |
| 29  | 10                    | 6 (60%)             | 1,839 | 1,638 (89.07%)           | 9                   | 8 (88.89%)   | 1,056               | 930 (88.07%)        | 21  | 19 (90.48%)            | 1,840               | 1,678 (91.2%)  |                       |                     |  |                          |                     |  |                     |                     |  |                        |                     |  |

**Supplementary Table S12** Baseline characteristics of moderate stroke patients about safety outcome before and after 30 day-by-day matching

|                       | Unmatched       |                |         |                   |                | Matched |                 |              |         |                   | p-Value |              |
|-----------------------|-----------------|----------------|---------|-------------------|----------------|---------|-----------------|--------------|---------|-------------------|---------|--------------|
|                       | Early treatment | No treatment   | p-Value | Delayed treatment | No treatment   | p-Value | Early treatment | No treatment | p-Value | Delayed treatment |         | No treatment |
| Total                 | 764 (100%)      | 1,330 (100%)   | 0.2922  | 661 (100%)        | 1,330 (100%)   | 0.0495  | 763 (100%)      | 763 (100%)   | 0.7979  | 658 (100%)        | 0.6995  |              |
| Gender                |                 |                |         |                   |                |         |                 |              |         |                   |         |              |
| Female                | 385 (50.39%)    | 702 (52.78%)   |         | 318 (48.11%)      | 702 (52.78%)   |         | 385 (50.46%)    | 390 (51.11%) |         | 318 (48.33%)      |         |              |
| Male                  | 379 (49.61%)    | 628 (47.22%)   |         | 343 (51.89%)      | 628 (47.22%)   |         | 378 (49.54%)    | 373 (48.89%) |         | 340 (51.67%)      |         |              |
| Age                   |                 |                |         |                   |                |         |                 |              |         |                   |         |              |
| ≥80                   | 296 (38.74%)    | 809 (60.83%)   | <0.0001 | 259 (39.18%)      | 809 (60.83%)   | <0.0001 | 296 (38.79%)    | 298 (39.06%) | 0.185   | 246 (37.39%)      | 0.6219  |              |
| 70-80                 | 248 (32.46%)    | 339 (25.49%)   |         | 197 (29.8%)       | 339 (25.49%)   |         | 248 (32.5%)     | 219 (28.7%)  |         | 197 (29.94%)      |         |              |
| <70                   | 220 (28.8%)     | 182 (13.68%)   |         | 205 (31.01%)      | 182 (13.68%)   |         | 219 (28.7%)     | 246 (32.24%) |         | 203 (30.85%)      |         |              |
| Medication history    |                 |                |         |                   |                |         |                 |              |         |                   |         |              |
| Antihypertensive      | 673 (88.09%)    | 1,124 (84.51%) | 0.0239  | 563 (85.17%)      | 1,124 (84.51%) | 0.6986  | 672 (88.07%)    | 670 (87.81%) | 0.8751  | 560 (85.11%)      | 0.8152  |              |
| Antidiabetic          | 198 (25.92%)    | 357 (26.84%)   | 0.644   | 157 (23.75%)      | 357 (26.84%)   | 0.1379  | 198 (25.95%)    | 178 (23.33%) | 0.2348  | 157 (23.86%)      | 0.8457  |              |
| Lipid-lowering agents | 157 (20.55%)    | 236 (17.74%)   | 0.1135  | 125 (18.91%)      | 236 (17.74%)   | 0.5247  | 156 (20.45%)    | 156 (20.45%) | 1       | 123 (18.69%)      | 0.9435  |              |
| Anticoagulant         | 312 (40.84%)    | 156 (11.73%)   | <0.0001 | 142 (21.48%)      | 156 (11.73%)   | <0.0001 | 311 (40.76%)    | 302 (39.58%) | 0.6384  | 140 (21.28%)      | 0.586   |              |
| Antiplatelet          | 326 (42.67%)    | 763 (57.37%)   | <0.0001 | 317 (47.96%)      | 763 (57.37%)   | <0.0001 | 326 (42.73%)    | 335 (43.91%) | 0.642   | 316 (48.02%)      | 0.1845  |              |
| NSAIDs                | 764 (100%)      | 1,327 (99.77%) | 1       | 660 (99.85%)      | 1,327 (99.77%) | 0.7274  | 763 (100%)      | 763 (100%)   | 0.5388  | 657 (99.85%)      | 1       |              |
| Medical history       |                 |                |         |                   |                |         |                 |              |         |                   |         |              |
| Liver disease         | 98 (12.83%)     | 177 (13.31%)   | 0.7537  | 89 (13.46%)       | 177 (13.31%)   | 0.9232  | 98 (12.84%)     | 92 (12.06%)  | 0.6418  | 88 (13.37%)       | 0.8719  |              |
| Peptic ulcer disease  | 206 (26.96%)    | 439 (33.01%)   | 0.0039  | 196 (29.65%)      | 439 (33.01%)   | 0.1303  | 206 (27%)       | 196 (25.69%) | 0.5611  | 194 (29.48%)      | 0.3922  |              |
| Hypertension          | 579 (75.79%)    | 1,091 (82.03%) | 0.0006  | 502 (75.95%)      | 1,091 (82.03%) | 0.0014  | 579 (75.88%)    | 586 (76.8%)  | 0.6733  | 499 (75.84%)      | 0.4454  |              |
| Dyslipidemia          | 261 (34.16%)    | 374 (28.12%)   | 0.0038  | 222 (33.59%)      | 374 (28.12%)   | 0.0122  | 261 (34.21%)    | 267 (34.99%) | 0.7468  | 221 (33.59%)      | 1       |              |
| IHD                   | 328 (42.93%)    | 616 (46.32%)   | 0.1341  | 309 (46.75%)      | 616 (46.32%)   | 0.8557  | 328 (42.99%)    | 337 (44.17%) | 0.6422  | 307 (46.66%)      | 0.8251  |              |
| ICH                   | 11 (1.44%)      | 53 (3.98%)     | 0.0011  | 15 (2.27%)        | 53 (3.98%)     | 0.0471  | 11 (1.44%)      | 15 (1.97%)   | 0.4288  | 15 (2.28%)        | 1       |              |
| TIA                   | 40 (5.24%)      | 75 (5.64%)     | 0.6964  | 36 (5.45%)        | 75 (5.64%)     | 0.8598  | 40 (5.24%)      | 44 (5.77%)   | 0.6535  | 35 (5.32%)        | 0.7068  |              |
| Alcohol intoxication  | 4 (0.52%)       | 14 (1.05%)     | 0.2068  | 9 (1.36%)         | 14 (1.05%)     | 0.5435  | 4 (0.52%)       | 7 (0.92%)    | 0.364   | 8 (1.22%)         | 0.591   |              |
| GI bleeding           | 83 (10.86%)     | 197 (14.81%)   | 0.0106  | 73 (11.04%)       | 197 (14.81%)   | 0.0207  | 83 (10.88%)     | 71 (9.31%)   | 0.3078  | 73 (11.09%)       | 0.4166  |              |
| Hematuria             | 36 (4.71%)      | 75 (5.64%)     | 0.362   | 30 (4.54%)        | 75 (5.64%)     | 0.3008  | 36 (4.72%)      | 40 (5.24%)   | 0.6379  | 30 (4.56%)        | 0.6846  |              |
| VTE                   | 27 (3.53%)      | 29 (2.18%)     | 0.0646  | 10 (1.51%)        | 29 (2.18%)     | 0.3114  | 26 (3.41%)      | 29 (3.8%)    | 0.6803  | 10 (1.52%)        | 0.8259  |              |
| Systemic embolism     | 16 (2.09%)      | 53 (3.98%)     | 0.0196  | 17 (2.57%)        | 53 (3.98%)     | 0.1069  | 16 (2.1%)       | 16 (2.1%)    | 1       | 16 (2.43%)        | 0.5732  |              |
| CHF                   | 378 (49.48%)    | 649 (48.8%)    | 0.7646  | 293 (44.33%)      | 649 (48.8%)    | 0.0599  | 377 (49.41%)    | 390 (51.11%) | 0.5057  | 291 (44.22%)      | 0.8244  |              |
| Myocardial infarction | 43 (5.63%)      | 129 (9.7%)     | 0.0011  | 51 (7.72%)        | 129 (9.7%)     | 0.1461  | 43 (5.64%)      | 35 (4.59%)   | 0.3524  | 51 (7.5%)         | 0.5979  |              |
| PVD                   | 65 (8.51%)      | 134 (10.08%)   | 0.2391  | 47 (7.11%)        | 134 (10.08%)   | 0.0302  | 65 (8.52%)      | 61 (7.99%)   | 0.7099  | 46 (6.99%)        | 0.3075  |              |
| CVA                   | 408 (53.4%)     | 703 (52.86%)   | 0.8096  | 342 (51.74%)      | 703 (52.86%)   | 0.6382  | 407 (53.34%)    | 417 (54.65%) | 0.6075  | 339 (51.52%)      | 0.5082  |              |
| Diabetes mellitus     | 257 (33.64%)    | 484 (36.39%)   | 0.2048  | 215 (32.53%)      | 484 (36.39%)   | 0.0889  | 257 (33.68%)    | 242 (31.72%) | 0.4131  | 215 (32.67%)      | 0.7253  |              |

**Supplementary Table S12 (Continued)**

|                                  | Unmatched                                                                                                                  |              |         |              | Matched         |              |              |              |        |              |              |        |
|----------------------------------|----------------------------------------------------------------------------------------------------------------------------|--------------|---------|--------------|-----------------|--------------|--------------|--------------|--------|--------------|--------------|--------|
|                                  | Early treatment                                                                                                            | No treatment | p-Value |              | Early treatment | No treatment | p-Value      |              |        |              |              |        |
| CKD                              | 210 (27.49%)                                                                                                               | 442 (33.23%) | 0.0063  | 182 (27.53%) | 442 (33.23%)    | 0.0098       | 210 (27.52%) | 209 (27.39%) | 0.9543 | 182 (27.66%) | 192 (29.18%) | 0.5411 |
| Secondary prevention             |                                                                                                                            |              |         |              |                 |              |              |              |        |              |              |        |
| Anticoagulant                    |                                                                                                                            |              |         |              |                 |              |              |              |        |              |              |        |
| NOAC                             | 183 (23.95%)                                                                                                               | 0            |         | 367 (55.52%) | 0               |              | 183 (23.98%) | 0            |        | 365 (55.47%) | 0            |        |
| Warfarin                         | 469 (61.39%)                                                                                                               | 0            |         | 267 (40.39%) | 0               |              | 468 (61.34%) | 0            |        | 266 (40.43%) | 0            |        |
| Both                             | 112 (14.66%)                                                                                                               | 0            |         | 27 (4.08%)   | 0               |              | 112 (14.68%) | 0            |        | 27 (4.1%)    | 0            |        |
| Antiplatelet (AIS to index date) | Reference to Supplementary Table 11, moderate stroke, 0–6th day for early treatment and 7th–29th day for delayed treatment |              |         |              |                 |              |              |              |        |              |              |        |
|                                  |                                                                                                                            |              |         |              |                 |              | 515 (67.5%)  | 510 (66.84%) | 0.7852 | 590 (89.67%) | 593 (90.12%) | 0.7838 |

Abbreviations: AIS, acute ischemic stroke; CHF, congestive heart failure; CKD, chronic kidney disease; CVA, cerebrovascular accident; GI, gastrointestinal; ICH, intracranial hemorrhage; IHD, ischemic heart disease; NOAC, non-vitamin K antagonist oral anticoagulant; NSAIDs, nonsteroidal anti-inflammatory drugs; PVD, peripheral vascular disease; TIA, transient ischemic attack; VTE, venous thromboembolism. Note: Data are mean ± standard deviation (SD) or n (%).

**Supplementary Table S13** Baseline characteristics of severe stroke patients in terms of the safety outcome before and after 30 day-by-day matching

|                       | Unmatched       |                |         |                   |                | Matched |                 |              |         |                   | p-Value      |              |
|-----------------------|-----------------|----------------|---------|-------------------|----------------|---------|-----------------|--------------|---------|-------------------|--------------|--------------|
|                       | Early treatment | No treatment   | p-Value | Delayed treatment | No treatment   | p-Value | Early treatment | No treatment | p-Value | Delayed treatment |              | No treatment |
| Total                 | 952 (100%)      | 2,634 (100%)   | 0.9333  | 643 (100%)        | 2,634 (100%)   | 0.9311  | 950 (100%)      | 950 (100%)   | 0.7441  | 642 (100%)        | 642 (100%)   | 0.9549       |
| Gender                |                 |                |         |                   |                |         |                 |              |         |                   |              |              |
| Female                | 557 (58.51%)    | 1,537 (58.35%) |         | 374 (58.16%)      | 1,537 (58.35%) |         | 556 (58.53%)    | 563 (59.26%) |         | 373 (58.1%)       | 372 (57.94%) |              |
| Male                  | 395 (41.49%)    | 1,097 (41.65%) |         | 269 (41.84%)      | 1,097 (41.65%) |         | 394 (41.47%)    | 387 (40.74%) |         | 269 (41.9%)       | 270 (42.06%) |              |
| Age                   |                 |                |         |                   |                |         |                 |              |         |                   |              |              |
| ≥80                   | 386 (40.55%)    | 1,382 (52.47%) | <0.0001 | 263 (40.9%)       | 1,382 (52.47%) | <0.0001 | 386 (40.63%)    | 393 (41.37%) | 0.8183  | 263 (40.97%)      | 263 (40.97%) | 0.5933       |
| 70-80                 | 329 (34.56%)    | 808 (30.68%)   |         | 216 (33.59%)      | 808 (30.68%)   |         | 328 (34.53%)    | 315 (33.16%) |         | 215 (33.49%)      | 201 (31.31%) |              |
| <70                   | 237 (24.89%)    | 444 (16.86%)   |         | 164 (25.51%)      | 444 (16.86%)   |         | 236 (24.84%)    | 242 (25.47%) |         | 164 (25.55%)      | 178 (27.73%) |              |
| Medication history    |                 |                |         |                   |                |         |                 |              |         |                   |              |              |
| Antihypertensive      | 840 (88.24%)    | 2,288 (86.86%) | 0.2773  | 553 (86%)         | 2,288 (86.86%) | 0.5644  | 838 (88.21%)    | 837 (88.11%) | 0.9434  | 552 (85.98%)      | 552 (85.98%) | 1            |
| Antidiabetic          | 265 (27.84%)    | 744 (28.25%)   | 0.8095  | 144 (22.4%)       | 744 (28.25%)   | 0.0028  | 264 (27.79%)    | 251 (26.42%) | 0.5023  | 144 (22.43%)      | 130 (20.25%) | 0.3403       |
| Lipid-lowering agents | 200 (21.01%)    | 508 (19.29%)   | 0.2526  | 146 (22.71%)      | 508 (19.29%)   | 0.0518  | 198 (20.84%)    | 175 (18.42%) | 0.184   | 145 (22.59%)      | 139 (21.65%) | 0.6866       |
| Anticoagulant         | 372 (39.08%)    | 381 (14.46%)   | <0.0001 | 135 (21%)         | 381 (14.46%)   | <0.0001 | 370 (38.95%)    | 365 (38.42%) | 0.8138  | 134 (20.87%)      | 137 (21.34%) | 0.8374       |
| Antiplatelet          | 430 (45.17%)    | 1,470 (55.81%) | <0.0001 | 283 (44.01%)      | 1,470 (55.81%) | <0.0001 | 429 (45.16%)    | 444 (46.74%) | 0.4899  | 282 (43.93%)      | 273 (42.52%) | 0.6121       |
| NSAID                 | 950 (99.79%)    | 2,621 (99.51%) | 0.2455  | 641 (99.69%)      | 2,621 (99.51%) | 0.5388  | 948 (99.79%)    | 948 (99.79%) | 1       | 640 (99.69%)      | 640 (99.69%) | 1            |
| Medical history       |                 |                |         |                   |                |         |                 |              |         |                   |              |              |
| Liver disease         | 116 (12.18%)    | 295 (11.2%)    | 0.4135  | 71 (11.04%)       | 295 (11.2%)    | 0.9094  | 115 (12.11%)    | 104 (10.95%) | 0.4294  | 70 (10.9%)        | 65 (10.12%)  | 0.6492       |
| Peptic ulcer disease  | 263 (27.63%)    | 817 (31.02%)   | 0.0506  | 153 (23.79%)      | 817 (31.02%)   | 0.0003  | 263 (27.68%)    | 262 (27.58%) | 0.9591  | 152 (23.68%)      | 135 (21.03%) | 0.2548       |
| Hypertension          | 737 (77.42%)    | 2,156 (81.85%) | 0.003   | 497 (77.29%)      | 2,156 (81.85%) | 0.0083  | 735 (77.37%)    | 738 (77.68%) | 0.869   | 496 (77.26%)      | 512 (79.75%) | 0.277        |
| Dyslipidemia          | 311 (32.67%)    | 789 (29.95%)   | 0.1197  | 214 (33.28%)      | 789 (29.95%)   | 0.1008  | 309 (32.53%)    | 274 (28.84%) | 0.0817  | 213 (33.18%)      | 207 (32.24%) | 0.7212       |
| IHD                   | 396 (41.6%)     | 1,259 (47.8%)  | 0.001   | 267 (41.52%)      | 1,259 (47.8%)  | 0.0042  | 395 (41.58%)    | 400 (42.11%) | 0.8161  | 266 (41.43%)      | 255 (39.72%) | 0.5319       |
| ICH                   | 23 (2.42%)      | 69 (2.62%)     | 0.7334  | 13 (2.02%)        | 69 (2.62%)     | 0.3842  | 23 (2.42%)      | 24 (2.53%)   | 0.8826  | 13 (2.02%)        | 11 (1.71%)   | 0.6803       |
| TIA                   | 47 (4.94%)      | 125 (4.75%)    | 0.8128  | 22 (3.42%)        | 125 (4.75%)    | 0.1459  | 46 (4.84%)      | 51 (5.37%)   | 0.6023  | 22 (3.43%)        | 17 (2.65%)   | 0.4162       |
| Alcohol intoxication  | 7 (0.74%)       | 22 (0.84%)     | 0.7679  | 6 (0.93%)         | 22 (0.84%)     | 0.8089  | 6 (0.63%)       | 3 (0.32%)    | 0.3162  | 6 (0.93%)         | 8 (1.25%)    | 0.5909       |
| GI bleeding           | 80 (8.4%)       | 305 (11.58%)   | 0.0067  | 50 (7.78%)        | 305 (11.58%)   | 0.0054  | 80 (8.42%)      | 61 (6.42%)   | 0.0963  | 49 (7.63%)        | 50 (7.79%)   | 0.9167       |
| Hematuria             | 37 (3.89%)      | 89 (3.38%)     | 0.4659  | 25 (3.89%)        | 89 (3.38%)     | 0.5276  | 37 (3.89%)      | 35 (3.68%)   | 0.8101  | 24 (3.74%)        | 21 (3.27%)   | 0.6489       |
| VTE                   | 28 (2.94%)      | 63 (2.39%)     | 0.3556  | 14 (2.18%)        | 63 (2.39%)     | 0.7475  | 28 (2.95%)      | 20 (2.11%)   | 0.2422  | 14 (2.18%)        | 14 (2.18%)   | 1            |
| Systemic embolism     | 38 (3.99%)      | 111 (4.21%)    | 0.7681  | 19 (2.95%)        | 111 (4.21%)    | 0.1425  | 38 (4%)         | 36 (3.79%)   | 0.8125  | 19 (2.96%)        | 14 (2.18%)   | 0.3779       |
| CHF                   | 505 (53.05%)    | 1,331 (50.53%) | 0.1834  | 285 (44.32%)      | 1,331 (50.53%) | 0.0048  | 503 (52.95%)    | 487 (51.26%) | 0.4625  | 285 (44.39%)      | 291 (45.33%) | 0.7364       |
| Myocardial infarction | 85 (8.93%)      | 256 (9.72%)    | 0.4761  | 43 (6.69%)        | 256 (9.72%)    | 0.0167  | 85 (8.95%)      | 89 (9.37%)   | 0.7504  | 43 (6.7%)         | 43 (6.7%)    | 1            |
| PVD                   | 94 (9.87%)      | 289 (10.97%)   | 0.3472  | 45 (7%)           | 289 (10.97%)   | 0.0028  | 93 (9.79%)      | 89 (9.37%)   | 0.7552  | 45 (7.01%)        | 40 (6.23%)   | 0.5746       |
| CVA                   | 549 (57.67%)    | 1,570 (59.61%) | 0.2975  | 415 (64.54%)      | 1,570 (59.61%) | 0.0217  | 548 (57.68%)    | 544 (57.26%) | 0.8527  | 414 (64.49%)      | 421 (65.58%) | 0.6821       |
| Diabetes mellitus     | 326 (34.24%)    | 978 (37.13%)   | 0.1126  | 196 (30.48%)      | 978 (37.13%)   | 0.0016  | 324 (34.11%)    | 297 (31.26%) | 0.1866  | 196 (30.53%)      | 182 (28.35%) | 0.3913       |

**Supplementary Table S13 (Continued)**

|                                  | Unmatched                                                                                                                  |              |         |                   | Matched      |                 |              |              | p-Value |                   |              |         |
|----------------------------------|----------------------------------------------------------------------------------------------------------------------------|--------------|---------|-------------------|--------------|-----------------|--------------|--------------|---------|-------------------|--------------|---------|
|                                  | Early treatment                                                                                                            | No treatment | p-Value | Delayed treatment | No treatment | Early treatment | No treatment | p-Value      |         | Delayed treatment | No treatment | p-Value |
| CKD                              | 240 (25.21%)                                                                                                               | 808 (30.68%) | 0.0015  | 151 (23.48%)      | 808 (30.68%) | 0.0003          | 239 (25.16%) | 223 (23.47%) | 0.3922  | 150 (23.36%)      | 143 (22.27%) | 0.6416  |
| Secondary prevention             |                                                                                                                            |              |         |                   |              |                 |              |              |         |                   |              |         |
| Anticoagulant                    |                                                                                                                            |              |         |                   |              |                 |              |              |         |                   |              |         |
| NOAC                             | 179 (18.8%)                                                                                                                | 0            |         | 347 (53.97%)      | 0            |                 | 179 (18.84%) | 0            |         | 347 (54.05%)      | 0            |         |
| Warfarin                         | 662 (69.54%)                                                                                                               | 0            |         | 271 (42.15%)      | 0            |                 | 660 (69.47%) | 0            |         | 270 (42.06%)      | 0            |         |
| Both                             | 111 (11.66%)                                                                                                               | 0            |         | 25 (3.89%)        | 0            |                 | 111 (11.68%) | 0            |         | 25 (3.89%)        | 0            |         |
| Antiplatelet (AIS to index date) | Reference to Supplementary Table 11, severe stroke, 0–12th day for early treatment and 13th–29th day for delayed treatment |              |         |                   |              |                 |              |              |         |                   |              |         |
|                                  |                                                                                                                            |              |         |                   |              |                 | 711 (74.84%) | 721 (75.89%) | 0.5944  | 573 (89.25%)      | 580 (90.34%) | 0.5187  |

Abbreviations: AIS, acute ischemic stroke; CHF, congestive heart failure; CKD, chronic kidney disease; CVA, cerebrovascular accident; GI, gastrointestinal; ICH, intracranial hemorrhage; IHD, ischemic heart disease; NOAC, non-vitamin K antagonist oral anticoagulant; NSAIDs, nonsteroidal anti-inflammatory drugs; PVD, peripheral vascular disease; TIA, transient ischemic attack; VTE, venous thromboembolism. Note: Data are mean ± standard deviation (SD) or n (%).

**Supplementary Table S14** Incidence rate, rate ratio (RR), rate difference (RD), and number needed to treat (NNT) for composite outcome, effectiveness, and safety, in early use and delayed use of OACs in patients with AF hospitalized for stroke

|                                                         | AF patient with mild stroke    |        |                   |          | AF patient with moderate stroke |          |                   |        | AF patient with severe stroke |          |                   |        |
|---------------------------------------------------------|--------------------------------|--------|-------------------|----------|---------------------------------|----------|-------------------|--------|-------------------------------|----------|-------------------|--------|
|                                                         | OACs use in PS-matched cohorts |        |                   |          |                                 |          |                   |        |                               |          |                   |        |
|                                                         | Early                          | No     | Delayed           | No       | Early                           | No       | Delayed           | No     | Early                         | No       | Delayed           | No     |
| Composite outcome                                       |                                |        |                   |          |                                 |          |                   |        |                               |          |                   |        |
| Case number                                             | 724                            | 321    | 597               | 426      | 425                             | 207      | 322               | 217    | 549                           | 362      | 354               | 255    |
| Person-years (p-yr)                                     | 1,714.48                       | 437.23 | 1,536.26          | 964.96   | 740.69                          | 175.7    | 671.33            | 350.23 | 584.77                        | 262.67   | 477.34            | 312.66 |
| Severity-specific incidence rate, per 1,000 p-yr        | 444.5                          |        |                   |          | 604.25                          |          |                   |        | 928.28                        |          |                   |        |
| Incidence rate, per 1,000 p-yr                          | 422.29                         | 734.16 | 388.61            | 441.47   | 573.79                          | 1,178.17 | 479.64            | 619.59 | 938.83                        | 1,378.14 | 741.61            | 815.58 |
| Incidence RD, per 1,000 p-yr                            | 311.87                         | Ref.   | 52.86             | Ref.     | 604.38                          | Ref.     | 139.95            | Ref.   | 439.31                        | Ref.     | 73.97             | Ref.   |
| Incidence RR (95% CI)                                   | 0.58 (0.53, 0.62)              | Ref.   | 0.88 (0.81, 0.95) | Ref.     | 0.49 (0.44, 0.54)               | Ref.     | 0.77 (0.69, 0.87) | Ref.   | 0.68 (0.62, 0.75)             | Ref.     | 0.91 (0.81, 1.02) | Ref.   |
| NNT                                                     | 3.2                            |        | 18.9              |          | 1.7                             |          | 7.1               |        | 2.3                           |          | 13.5              |        |
| Effectiveness outcome                                   |                                |        |                   |          |                                 |          |                   |        |                               |          |                   |        |
| Case number                                             | 570                            | 250    | 447               | 352      | 356                             | 179      | 269               | 203    | 487                           | 330      | 321               | 249    |
| Person-years (p-yr)                                     | 2,009.03                       | 600.59 | 1,813.92          | 1,119.64 | 908.59                          | 280.56   | 814.21            | 448.09 | 742.88                        | 365.07   | 597.77            | 412.7  |
| Stroke severity-specific incidence rate, per 1,000 p-yr | 292.07                         |        |                   |          | 410.78                          |          |                   |        | 654.73                        |          |                   |        |
| Incidence rate, per 1,000 p-yr                          | 283.72                         | 416.26 | 246.43            | 314.39   | 391.82                          | 638      | 330.38            | 453.03 | 655.56                        | 903.93   | 537               | 603.34 |
| Incidence RD, per 1,000 p-yr                            | 132.54                         | Ref.   | 67.96             | Ref.     | 246.18                          | Ref.     | 122.65            | Ref.   | 248.37                        | Ref.     | 66.34             | Ref.   |
| Incidence RR (95% CI)                                   | 0.68 (0.63, 0.74)              | Ref.   | 0.78 (0.72, 0.85) | Ref.     | 0.61 (0.55, 0.68)               | Ref.     | 0.73 (0.65, 0.82) | Ref.   | 0.73 (0.66, 0.80)             | Ref.     | 0.89 (0.80, 1.00) | Ref.   |
| NNT                                                     | 7.5                            |        | 14.7              |          | 4.1                             |          | 8.2               |        | 4.0                           |          | 15.1              |        |
| Safety outcome                                          |                                |        |                   |          |                                 |          |                   |        |                               |          |                   |        |
| Case number                                             | 349                            | 119    | 330               | 226      | 190                             | 68       | 170               | 96     | 219                           | 95       | 141               | 99     |
| Person-years (p-yr)                                     | 2,493.64                       | 753.3  | 2,245.76          | 1,356.68 | 1,152.07                        | 323.82   | 1,021.38          | 445.74 | 1,032.39                      | 450.05   | 853.55            | 485    |
| Stroke severity-specific incidence rate, per 1,000 p-yr | 149.50                         |        |                   |          | 178.05                          |          |                   |        | 196.38                        |          |                   |        |
| Incidence rate, per 1,000 p-yr                          | 139.96                         | 157.97 | 146.94            | 166.58   | 164.92                          | 209.99   | 166.44            | 215.37 | 212.13                        | 211.09   | 165.19            | 204.12 |
| Incidence RD, per 1,000 p-yr                            | 18.01                          | Ref.   | 19.64             | Ref.     | 45.07                           | Ref.     | 48.93             | Ref.   | -1.04                         | Ref.     | 38.93             | Ref.   |
| Incidence RR (95% CI)                                   | 0.89 (0.82, 0.95)              | Ref.   | 0.88 (0.82, 0.95) | Ref.     | 0.79 (0.71, 0.87)               | Ref.     | 0.77 (0.69, 0.86) | Ref.   | 1.00 (0.92, 1.10)             | Ref.     | 0.81 (0.73, 0.90) | Ref.   |
| NNT                                                     | 55.5                           |        | 50.9              |          | 22.2                            |          | 20.4              |        | -961.5                        |          | 25.7              |        |

Abbreviations: AF, atrial fibrillation; OAC, oral anticoagulant.

**Supplementary Table S15** Descriptive results of the mild stroke in terms of composite outcomes

| Composite outcome                         | Mild stroke       |              |                   |              |
|-------------------------------------------|-------------------|--------------|-------------------|--------------|
|                                           | Early treatment   |              | Delayed treatment |              |
|                                           | User              | Nonuser      | User              | Nonuser      |
| Sample, <i>n</i>                          | 1,307             | 1,307        | 1,171             | 1,171        |
| Observed events, <i>n</i> (%)             | 724 (55.39%)      | 321 (24.56%) | 597 (50.98%)      | 426 (36.38%) |
| Ischemic stroke                           | 208 (15.91%)      | 122 (9.33%)  | 215 (18.36%)      | 135 (11.53%) |
| Gastrointestinal bleeding                 | 150 (11.48%)      | 57 (4.36%)   | 125 (10.67%)      | 95 (8.11%)   |
| Transient ischemic attack                 | 104 (7.96%)       | 48 (3.67%)   | 44 (3.76%)        | 57 (4.87%)   |
| Myocardial infarction                     | 81 (6.2%)         | 29 (2.22%)   | 53 (4.53%)        | 45 (3.84%)   |
| Hematuria                                 | 59 (4.51%)        | 24 (1.84%)   | 72 (6.15%)        | 25 (2.13%)   |
| Cardiovascular death                      | 49 (3.75%)        | 20 (1.53%)   | 44 (3.76%)        | 43 (3.67%)   |
| Systemic embolism                         | 28 (2.14%)        | 13 (0.99%)   | 16 (1.37%)        | 16 (1.37%)   |
| Venous thromboembolism                    | 27 (2.07%)        | 6 (0.46%)    | 15 (1.28%)        | 8 (0.68%)    |
| Intracranial hemorrhage                   | 18 (1.38%)        | 2 (0.15%)    | 13 (1.11%)        | 2 (0.17%)    |
| Competing risk events, <i>n</i> (%)       | 38 (2.91%)        | 40 (3.06%)   | 47 (4.01%)        | 57 (4.87%)   |
| Drug censored <sup>a</sup> , <i>n</i> (%) | 249 (19.05%)      | 180 (13.77%) | 222 (18.96%)      | 266 (22.72%) |
| Pair censored <sup>b</sup> , <i>n</i> (%) |                   | 713 (54.55%) |                   | 295 (25.19%) |
| Median of follow-up days (IQR)            | 256 (45–743)      | 13 (4–61)    | 308 (60–732)      | 52 (10–459)  |
| Total follow-up year                      | 1,714.48          | 437.23       | 1,536.26          | 964.96       |
| Crude incidence rate (1,000 person-years) | 422.29            | 734.16       | 388.61            | 441.47       |
| Difference in incidence rate              | 311.87            |              | 52.86             |              |
| Ratio of incidence rate (95% CI)          | 0.58 (0.53, 0.62) |              | 0.88 (0.81, 0.95) |              |

Abbreviations: CI, confidence interval; IQR, interquartile range.

<sup>a</sup>Censored caused by holding or use of drugs.

<sup>b</sup>Use of drug within 30 days but categorized as controlled group owing to paired matching.

**Supplementary Table S16** Descriptive results of the moderate stroke in terms of composite outcomes

| Composite outcome                         | Moderate stroke   |              |                   |              |
|-------------------------------------------|-------------------|--------------|-------------------|--------------|
|                                           | Early treatment   |              | Delayed treatment |              |
|                                           | User              | Nonuser      | User              | Nonuser      |
| Sample, <i>n</i>                          | 691               | 691          | 572               | 572          |
| Observed events, <i>n</i> (%)             | 425 (61.51%)      | 207 (29.96%) | 322 (56.29%)      | 217 (37.94%) |
| Ischemic stroke                           | 153 (22.14%)      | 98 (14.18%)  | 133 (23.25%)      | 81 (14.16%)  |
| Gastrointestinal bleeding                 | 77 (11.14%)       | 33 (4.78%)   | 49 (8.57%)        | 45 (7.87%)   |
| Transient ischemic attack                 | 69 (9.99%)        | 44 (6.37%)   | 36 (6.29%)        | 48 (8.39%)   |
| Myocardial infarction                     | 34 (4.92%)        | 5 (0.72%)    | 35 (6.12%)        | 7 (1.22%)    |
| Hematuria                                 | 26 (3.76%)        | 13 (1.88%)   | 20 (3.5%)         | 13 (2.27%)   |
| Cardiovascular death                      | 32 (4.63%)        | 5 (0.72%)    | 25 (4.37%)        | 13 (2.27%)   |
| Systemic embolism                         | 7 (1.01%)         | 6 (0.87%)    | 7 (1.22%)         | 6 (1.05%)    |
| Venous thromboembolism                    | 18 (2.6%)         | 1 (0.14%)    | 7 (1.22%)         | 3 (0.52%)    |
| Intracranial hemorrhage                   | 9 (1.3%)          | 2 (0.29%)    | 10 (1.75%)        | 1 (0.17%)    |
| Competing risk events, <i>n</i> (%)       | 60 (8.68%)        | 42 (6.08%)   | 45 (7.87%)        | 54 (9.44%)   |
| Drug censored <sup>a</sup> , <i>n</i> (%) | 91 (13.17%)       | 80 (11.58%)  | 81 (14.16%)       | 124 (21.68%) |
| Pair censored <sup>b</sup> , <i>n</i> (%) |                   | 344 (49.78%) |                   | 129 (22.55%) |
| Median of follow-up days (IQR)            | 140 (32–629)      | 13 (6–45)    | 208.5 (40–669.5)  | 39 (9–284)   |
| Total follow-up year                      | 740.69            | 175.7        | 671.33            | 350.23       |
| Crude incidence rate (1,000 person-years) | 573.79            | 1,178.17     | 479.64            | 619.59       |
| Difference in incidence rate              | 604.38            |              | 139.95            |              |
| Ratio of incidence rate (95% CI)          | 0.49 (0.44, 0.54) |              | 0.77 (0.69, 0.87) |              |

Abbreviations: CI, confidence interval; IQR, interquartile range.

<sup>a</sup>Censored caused by holding or use of drugs.

<sup>b</sup>Use of drug within 30 days but categorized as controlled group owing to paired matching.



**Supplementary Table S17** Descriptive results of the severe stroke in terms of composite outcomes

| Composite outcome                         | Severe stroke     |              |                   |                 |
|-------------------------------------------|-------------------|--------------|-------------------|-----------------|
|                                           | Early treatment   |              | Delayed treatment |                 |
|                                           | User              | Nonuser      | User              | Nonuser         |
| Sample, <i>n</i>                          | 843               | 843          | 560               | 560             |
| Observed events, <i>n</i> (%)             | 549 (65.12%)      | 362 (42.94%) | 354 (63.21%)      | 255 (45.54%)    |
| Ischemic stroke                           | 203 (24.08%)      | 106 (12.57%) | 182 (32.5%)       | 91 (16.25%)     |
| Gastrointestinal bleeding                 | 164 (19.45%)      | 171 (20.28%) | 60 (10.71%)       | 63 (11.25%)     |
| Transient ischemic attack                 | 80 (9.49%)        | 43 (5.1%)    | 46 (8.21%)        | 50 (8.93%)      |
| Myocardial infarction                     | 40 (4.74%)        | 14 (1.66%)   | 26 (4.64%)        | 21 (3.75%)      |
| Hematuria                                 | 14 (1.66%)        | 5 (0.59%)    | 5 (0.89%)         | 6 (1.07%)       |
| Cardiovascular death                      | 21 (2.49%)        | 10 (1.19%)   | 15 (2.68%)        | 12 (2.14%)      |
| Systemic embolism                         | 8 (0.95%)         | 8 (0.95%)    | 5 (0.89%)         | 7 (1.25%)       |
| Venous thromboembolism                    | 12 (1.42%)        | 2 (0.24%)    | 10 (1.79%)        | 3 (0.54%)       |
| Intracranial hemorrhage                   | 7 (0.83%)         | 3 (0.36%)    | 5 (0.89%)         | 2 (0.36%)       |
| Competing risk events, <i>n</i> (%)       | 73 (8.66%)        | 72 (8.54%)   | 41 (7.32%)        | 62 (11.07%)     |
| Drug censored <sup>a</sup> , <i>n</i> (%) | 140 (16.61%)      | 110 (13.05%) | 93 (16.61%)       | 131 (23.39%)    |
| Pair censored <sup>b</sup> , <i>n</i> (%) |                   | 275 (32.62%) |                   | 86 (15.36%)     |
| Median of follow-up days (IQR)            | 63 (19–299)       | 21 (7–69)    | 88 (25.5–454.5)   | 44.5 (12–204.5) |
| Total follow-up year                      | 584.77            | 262.67       | 477.34            | 312.66          |
| Crude incidence rate (1,000 person-years) | 938.83            | 1,378.14     | 741.61            | 815.58          |
| Difference in incidence rate              | 439.31            |              | 73.97             |                 |
| Ratio of incidence rate (95% CI)          | 0.68 (0.62, 0.75) |              | 0.91 (0.81, 1.02) |                 |

Abbreviations: CI, confidence interval; IQR, interquartile range.

<sup>a</sup>Censored caused by holding or use of drugs.

<sup>b</sup>Use of drug within 30 days but categorized as controlled group owing to paired matching.

**Supplementary Table S18** Descriptive results of the mild stroke in terms of effectiveness outcomes

| Effectiveness                             | Mild stroke       |              |                   |              |
|-------------------------------------------|-------------------|--------------|-------------------|--------------|
|                                           | Early treatment   |              | Delayed treatment |              |
|                                           | User              | Nonuser      | User              | Nonuser      |
| Sample, <i>n</i>                          | 1,325             | 1,325        | 1,198             | 1,198        |
| Observed events, <i>n</i> (%)             | 570 (43.02%)      | 250 (18.87%) | 447 (37.31%)      | 352 (29.38%) |
| Ischemic stroke                           | 244 (18.42%)      | 105 (7.92%)  | 240 (20.03%)      | 155 (12.94%) |
| Transient ischemic attack                 | 115 (8.68%)       | 44 (3.32%)   | 51 (4.26%)        | 62 (5.18%)   |
| Myocardial infarction                     | 89 (6.72%)        | 40 (3.02%)   | 62 (5.18%)        | 63 (5.26%)   |
| Cardiovascular death                      | 63 (4.75%)        | 30 (2.26%)   | 57 (4.76%)        | 44 (3.67%)   |
| Systemic embolism                         | 30 (2.26%)        | 17 (1.28%)   | 19 (1.59%)        | 12 (1%)      |
| Venous thromboembolism                    | 29 (2.19%)        | 14 (1.06%)   | 18 (1.5%)         | 16 (1.34%)   |
| Competing risk events, <i>n</i> (%)       | 59 (4.45%)        | 60 (4.53%)   | 68 (5.68%)        | 84 (7.01%)   |
| Drug censored <sup>a</sup> , <i>n</i> (%) | 312 (23.55%)      | 206 (15.55%) | 280 (23.37%)      | 294 (24.54%) |
| Pair censored <sup>b</sup> , <i>n</i> (%) |                   | 712 (53.74%) |                   | 306 (25.54%) |
| Median of follow-up days (IQR)            | 360 (56–907)      | 15 (4–73)    | 411.5 (82–862)    | 67 (11–549)  |
| Total follow-up year                      | 2,009.03          | 600.59       | 1,813.92          | 1119.64      |
| Crude incidence rate (1,000 person-years) | 283.72            | 416.26       | 246.43            | 314.39       |
| Difference in incidence rate              | 132.54            |              | 67.96             |              |
| Ratio of incidence rate (95% CI)          | 0.68 (0.63, 0.74) |              | 0.78 (0.72, 0.85) |              |

Abbreviations: CI, confidence interval; IQR, interquartile range.

<sup>a</sup>Censored caused by holding or use of drugs.

<sup>b</sup>Use of drug within 30 days but categorized as controlled group owing to paired matching.

**Supplementary Table S19** Descriptive results of the moderate stroke in terms of effectiveness outcomes

| Effectiveness                             | Moderate stroke   |              |                   |              |
|-------------------------------------------|-------------------|--------------|-------------------|--------------|
|                                           | Early treatment   |              | Delayed treatment |              |
|                                           | User              | Nonuser      | User              | Nonuser      |
| Sample, <i>n</i>                          | 723               | 723          | 602               | 602          |
| Observed events, <i>n</i> (%)             | 356 (49.24%)      | 179 (24.76%) | 269 (44.68%)      | 203 (33.72%) |
| Ischemic stroke                           | 171 (23.65%)      | 95 (13.14%)  | 154 (25.58%)      | 94 (15.61%)  |
| Transient ischemic attack                 | 88 (12.17%)       | 57 (7.88%)   | 46 (7.64%)        | 62 (10.3%)   |
| Myocardial infarction                     | 38 (5.26%)        | 9 (1.24%)    | 31 (5.15%)        | 23 (3.82%)   |
| Cardiovascular death                      | 30 (4.15%)        | 11 (1.52%)   | 22 (3.65%)        | 13 (2.16%)   |
| Systemic embolism                         | 8 (1.11%)         | 2 (0.28%)    | 9 (1.5%)          | 6 (1%)       |
| Venous thromboembolism                    | 21 (2.9%)         | 5 (0.69%)    | 7 (1.16%)         | 5 (0.83%)    |
| Competing risk events, <i>n</i> (%)       | 77 (10.65%)       | 70 (9.68%)   | 64 (10.63%)       | 80 (13.29%)  |
| Drug censored <sup>a</sup> , <i>n</i> (%) | 128 (17.7%)       | 93 (12.86%)  | 103 (17.11%)      | 133 (22.09%) |
| Pair censored <sup>b</sup> , <i>n</i> (%) |                   | 355 (49.1%)  |                   | 127 (21.1%)  |
| Median of follow-up days (IQR)            | 189 (36–755)      | 16 (6–75)    | 278.5 (44–805)    | 52 (10–382)  |
| Total follow-up year                      | 908.59            | 280.56       | 814.21            | 448.09       |
| Crude incidence rate (1,000 person-years) | 391.82            | 638          | 330.38            | 453.03       |
| Difference in incidence rate              | 246.18            |              | 122.65            |              |
| Ratio of incidence rate (95% CI)          | 0.61 (0.55, 0.68) |              | 0.73 (0.65, 0.82) |              |

Abbreviations: CI, confidence interval; IQR, interquartile range.

<sup>a</sup>Censored caused by holding or use of drugs.

<sup>b</sup>Use of drug within 30 days but categorized as controlled group owing to paired matching.

**Supplementary Table S20** Descriptive results of the severe stroke in terms of effectiveness outcomes

| Effectiveness                             | Severe stroke    |              |                   |              |
|-------------------------------------------|------------------|--------------|-------------------|--------------|
|                                           | Early treatment  |              | Delayed treatment |              |
|                                           | User             | Nonuser      | User              | Nonuser      |
| Sample, <i>n</i>                          | 899              | 899          | 607               | 607          |
| Observed events, <i>n</i> (%)             | 487 (54.17%)     | 330 (36.71%) | 321 (52.88%)      | 249 (41.02%) |
| Ischemic stroke                           | 239 (26.59%)     | 117 (13.01%) | 204 (33.61%)      | 96 (15.82%)  |
| Transient ischemic attack                 | 182 (20.24%)     | 181 (20.13%) | 75 (12.36%)       | 117 (19.28%) |
| Myocardial infarction                     | 23 (2.56%)       | 13 (1.45%)   | 17 (2.8%)         | 15 (2.47%)   |
| Cardiovascular death                      | 13 (1.45%)       | 11 (1.22%)   | 7 (1.15%)         | 10 (1.65%)   |
| Systemic embolism                         | 16 (1.78%)       | 2 (0.22%)    | 5 (0.82%)         | 5 (0.82%)    |
| Venous thromboembolism                    | 14 (1.56%)       | 6 (0.67%)    | 13 (2.14%)        | 6 (0.99%)    |
| Competing risk events, <i>n</i> (%)       | 101 (11.23%)     | 119 (13.24%) | 59 (9.72%)        | 93 (15.32%)  |
| Drug censored <sup>a</sup> , <i>n</i> (%) | 195 (21.69%)     | 109 (12.12%) | 129 (21.25%)      | 148 (24.38%) |
| Pair censored <sup>b</sup> , <i>n</i> (%) |                  | 306 (34.04%) |                   | 80 (13.18%)  |
| Median of follow-up days (IQR)            | 68 (19–388)      | 20 (8–81)    | 99 (27–571)       | 50 (14–316)  |
| Total follow-up year                      | 742.88           | 365.07       | 597.77            | 412.7        |
| Crude incidence rate (1,000 person-years) | 655.56           | 903.93       | 537               | 603.34       |
| Difference in incidence rate              | 248.37           |              | 66.34             |              |
| Ratio of incidence rate (95% CI)          | 0.73 (0.66, 0.8) |              | 0.89 (0.8, 1)     |              |

Abbreviations: CI, confidence interval; IQR, interquartile range.

<sup>a</sup>Censored caused by holding or use of drugs.

<sup>b</sup>Use of drug within 30 days but categorized as controlled group owing to paired matching.

**Supplementary Table S21** Descriptive results of the mild stroke in terms of safety outcomes

| Safety                                    | Mild stroke       |              |                   |              |
|-------------------------------------------|-------------------|--------------|-------------------|--------------|
|                                           | Early treatment   |              | Delayed treatment |              |
|                                           | User              | Nonuser      | User              | Nonuser      |
| Sample, <i>n</i>                          | 1,383             | 1,383        | 1,358             | 1,358        |
| Observed events, <i>n</i> (%)             | 349 (25.23%)      | 119 (8.60%)  | 330 (24.30%)      | 226 (16.64%) |
| Gastrointestinal bleeding                 | 236 (17.06%)      | 97 (7.01%)   | 209 (15.39%)      | 178 (13.11%) |
| Hematuria                                 | 89 (6.44%)        | 19 (1.37%)   | 101 (7.44%)       | 44 (3.24%)   |
| Intracranial hemorrhage                   | 24 (1.74%)        | 3 (0.22%)    | 20 (1.47%)        | 4 (0.29%)    |
| Competing risk events, <i>n</i> (%)       | 163 (11.79%)      | 117 (8.46%)  | 178 (13.11%)      | 173 (12.74%) |
| Drug censored <sup>a</sup> , <i>n</i> (%) | 384 (27.77%)      | 276 (19.96%) | 343 (25.26%)      | 407 (29.97%) |
| Pair censored <sup>b</sup> , <i>n</i> (%) |                   | 766 (55.39%) |                   | 361 (26.58%) |
| Median of follow-up days (IQR)            | 526 (158–1,019)   | 17 (5–143)   | 487 (129–907)     | 82 (12–580)  |
| Total follow-up year                      | 2,493.64          | 753.3        | 2,245.76          | 1,356.68     |
| Crude incidence rate (1,000 person-years) | 139.96            | 157.97       | 146.94            | 166.58       |
| Difference in incidence rate              | 18.01             |              | 19.64             |              |
| Ratio of incidence rate (95% CI)          | 0.89 (0.82, 0.95) |              | 0.88 (0.82, 0.95) |              |

Abbreviations: CI, confidence interval; IQR, interquartile range.

<sup>a</sup>Censored caused by holding or use of drugs.

<sup>b</sup>Use of drug within 30 days but categorized as controlled group owing to paired matching.

**Supplementary Table S22** Descriptive results of the moderate stroke in terms of safety outcomes

| Safety                                    | Moderate stroke   |              |                   |              |
|-------------------------------------------|-------------------|--------------|-------------------|--------------|
|                                           | Early treatment   |              | Delayed treatment |              |
|                                           | User              | Nonuser      | User              | Nonuser      |
| Sample, <i>n</i>                          | 763               | 763          | 658               | 658          |
| Observed events, <i>n</i> (%)             | 190 (24.90%)      | 68 (8.91%)   | 170 (25.84%)      | 96 (14.59%)  |
| Gastrointestinal bleeding                 | 123 (16.12%)      | 52 (6.82%)   | 102 (15.5%)       | 72 (10.94%)  |
| Hematuria                                 | 52 (6.82%)        | 11 (1.44%)   | 54 (8.21%)        | 20 (3.04%)   |
| Intracranial hemorrhage                   | 15 (1.97%)        | 5 (0.66%)    | 14 (2.13%)        | 4 (0.61%)    |
| Competing risk events, <i>n</i> (%)       | 198 (25.95%)      | 125 (16.38%) | 124 (18.84%)      | 144 (21.88%) |
| Drug censored <sup>a</sup> , <i>n</i> (%) | 148 (19.4%)       | 127 (16.64%) | 141 (21.43%)      | 207 (31.46%) |
| Pair censored <sup>b</sup> , <i>n</i> (%) |                   | 406 (53.21%) |                   | 152 (23.1%)  |
| Median of follow-up days (IQR)            | 376 (74–881)      | 16 (6–94)    | 424 (98–883)      | 55 (10–306)  |
| Total follow-up year                      | 1,152.07          | 323.82       | 1,021.38          | 445.74       |
| Crude incidence rate (1,000 person-years) | 164.92            | 209.99       | 166.44            | 215.37       |
| Difference in incidence rate              | 45.07             |              | 48.93             |              |
| Ratio of incidence rate (95% CI)          | 0.79 (0.71, 0.87) |              | 0.77 (0.69, 0.86) |              |

Abbreviations: CI, confidence interval; IQR, interquartile range.

<sup>a</sup>Censored caused by holding or use of drugs.

<sup>b</sup>Use of drug within 30 days but categorized as controlled group owing to paired matching.

**Supplementary Table S23** Descriptive results of the severe stroke in terms of safety outcomes

| Safety                                    | Severe stroke   |              |                   |              |
|-------------------------------------------|-----------------|--------------|-------------------|--------------|
|                                           | Early treatment |              | Delayed treatment |              |
|                                           | User            | Nonuser      | User              | Nonuser      |
| Sample, <i>n</i>                          | 950             | 950          | 642               | 642          |
| Observed events, <i>n</i> (%)             | 219 (23.05%)    | 95 (10%)     | 141 (21.96%)      | 99 (15.42%)  |
| Gastrointestinal bleeding                 | 142 (14.95%)    | 75 (7.89%)   | 89 (13.86%)       | 71 (11.06%)  |
| Hematuria                                 | 65 (6.84%)      | 18 (1.89%)   | 46 (7.17%)        | 23 (3.58%)   |
| Intracranial hemorrhage                   | 12 (1.26%)      | 2 (0.21%)    | 6 (0.93%)         | 5 (0.78%)    |
| Competing risk events, <i>n</i> (%)       | 330 (34.74%)    | 307 (32.32%) | 177 (27.57%)      | 218 (33.96%) |
| Drug censored <sup>a</sup> , <i>n</i> (%) | 229 (24.11%)    | 157 (16.53%) | 159 (24.77%)      | 191 (29.75%) |
| Pair censored <sup>b</sup> , <i>n</i> (%) |                 | 335 (35.26%) |                   | 89 (13.86%)  |
| Median of follow-up days (IQR)            | 143 (27–585)    | 24 (8–112)   | 288.5 (59–800)    | 73 (16–358)  |
| Total follow-up year                      | 1,032.39        | 450.05       | 853.55            | 485          |
| Crude incidence rate (1,000 person-years) | 212.13          | 211.09       | 165.19            | 204.12       |
| Difference in incidence rate              | –1.04           |              | 38.93             |              |
| Ratio of incidence rate (95% CI)          | 1 (0.92, 1.1)   |              | 0.81 (0.73, 0.9)  |              |

Abbreviations: CI, confidence interval; IQR, interquartile range.

<sup>a</sup>Censored caused by holding or use of drugs.

<sup>b</sup>Use of drug within 30 days but categorized as controlled group owing to paired matching.
